# Supplementary material for: A Metataxonomic Approach Reveals Diversified Bacterial Communities in Antarctic Sponges
Source: PubMed Central journal article supplement (PMC8004616; doi:10.3390/md19030173), 2021-03-22
Supplement: marinedrugs-19-00173-s001.pdf [file marinedrugs-19-00173-s001.pdf]

## Supplementary Material

**Figure S1.** Alignments of CO1 (PorCOI2fwd/PorCOI2rev) sequence from B4 sponge with (A) the first BLAST hit *Asbestopluma lycopodium* and (B) the sequence of *M. acerata* displaying low query cover.

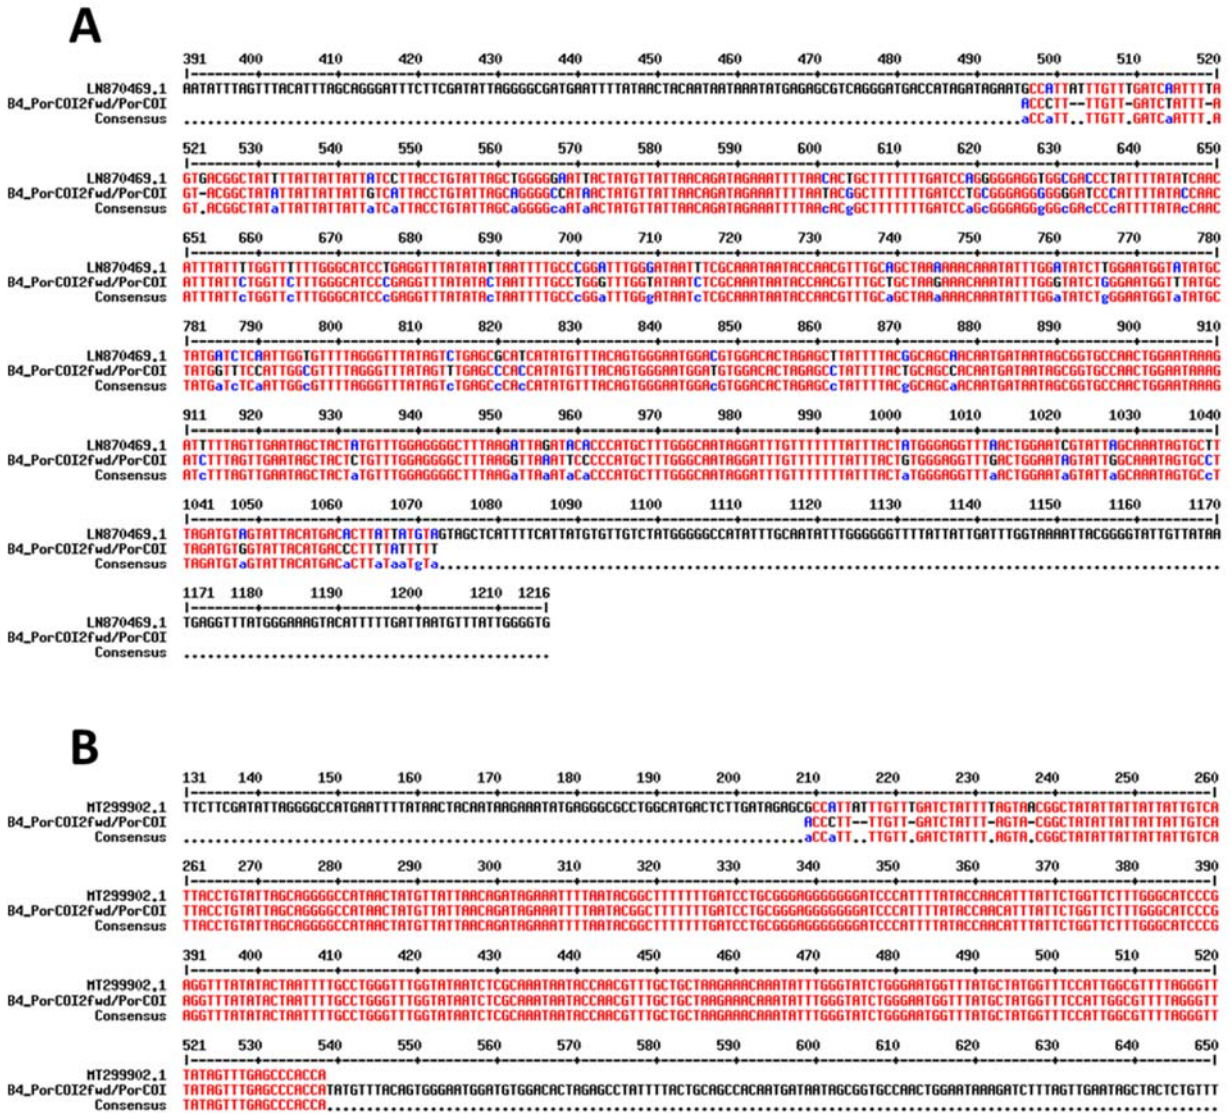

**Figure S2.** Alignment of CO1 (dgLCO1490/dgHCO2198) sequence from B4 sponge with the first BLAST hit (*M. acerata*).

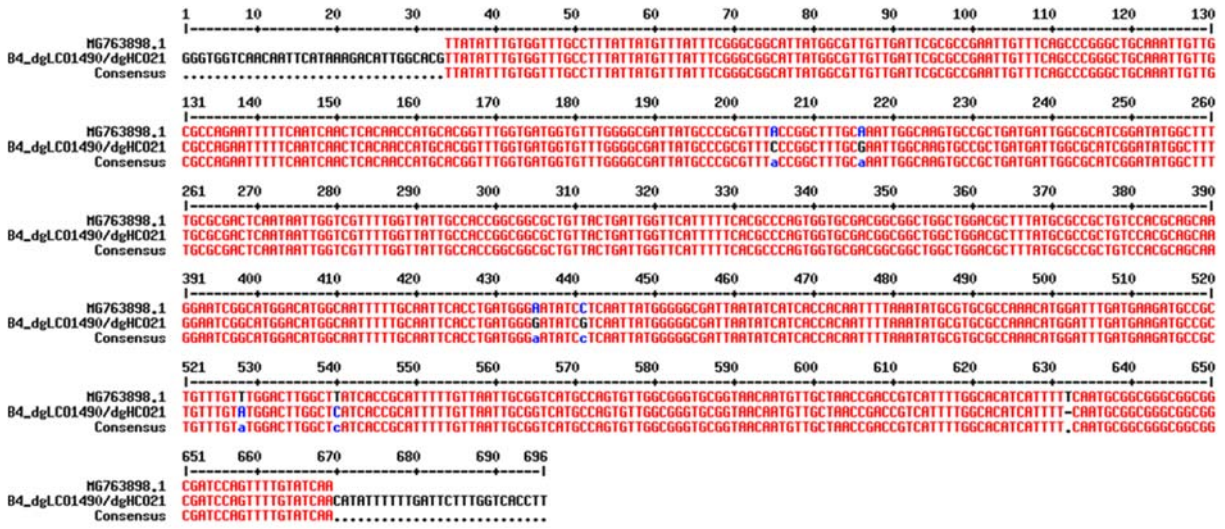

**Figure S3.** Alignment of CO1 (dgLCO1490/dgHCO2198) sequence from D4 sponge with the first BLAST hit (*H. pilosus*).

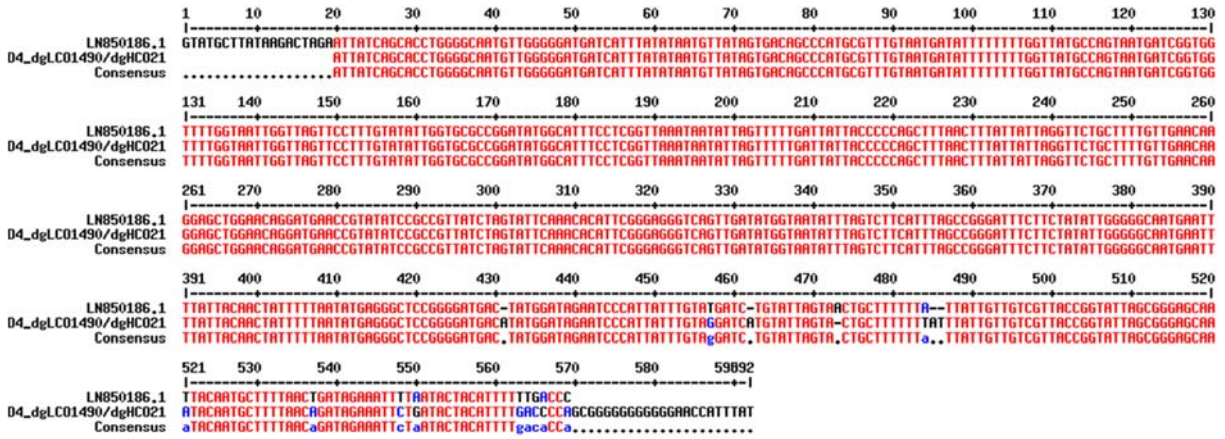

**Figure S4.** Taxonomy Bar Plot, reporting the relative frequencies (in percentage, %) of the bacteria taxons more representative for each of the four sponges under analysis . Sample code: B4= *M. (Oxymycale) acerata*; D4= *H. pilosus*, D6= *M. sarai*, C6= *H. (Rhizoniera) dancoi*. Each taxon is highlighted by a different color.

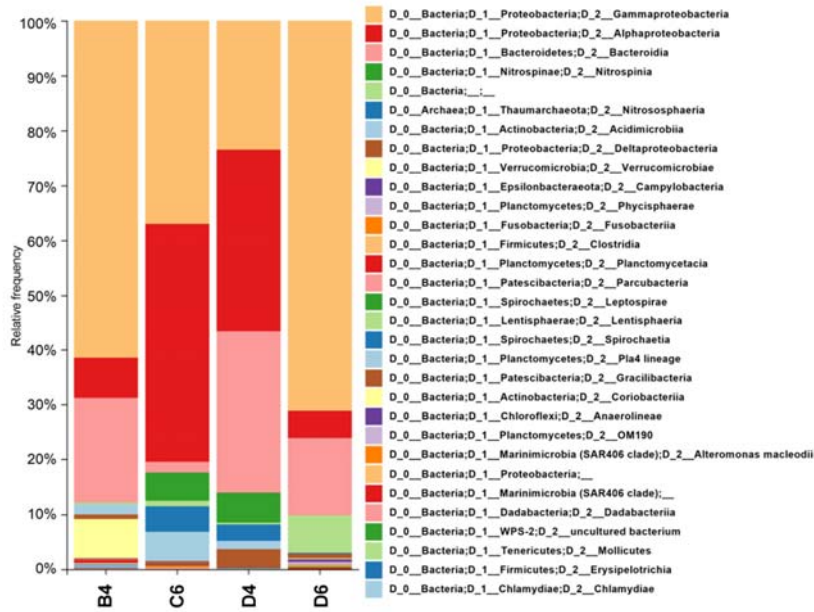

**Figure S5.** Krona plot at the seven increasing complexity levels: (a) Regnum, (b) Phylum, (c) Class, (d) Order, (e) Family, (f) Genus and (g) Species.

**a)**

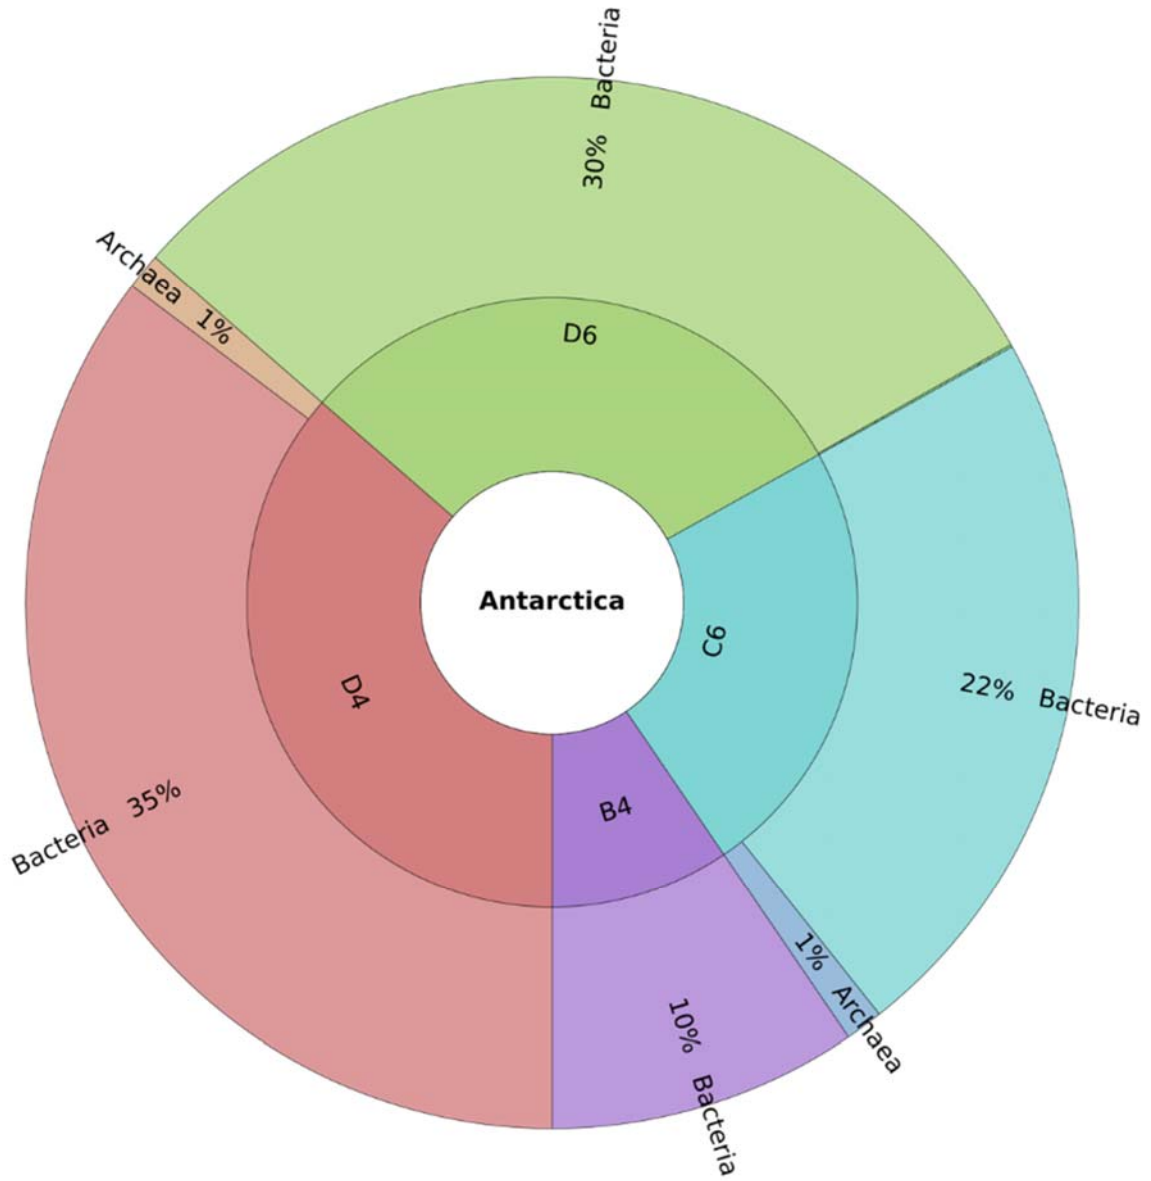

b)

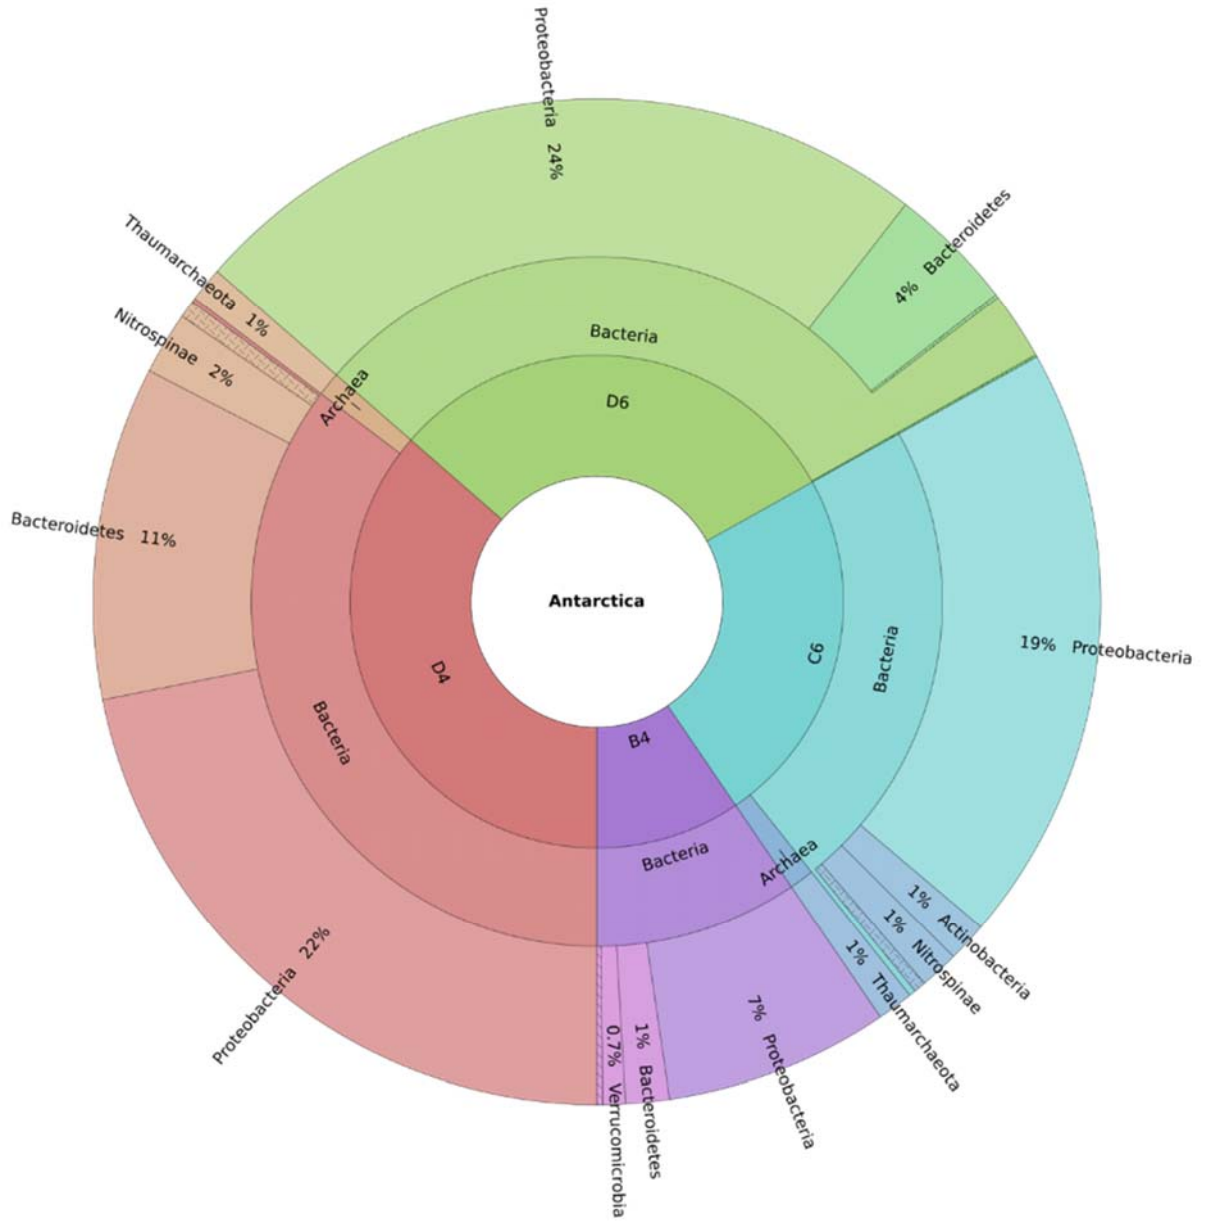

c)

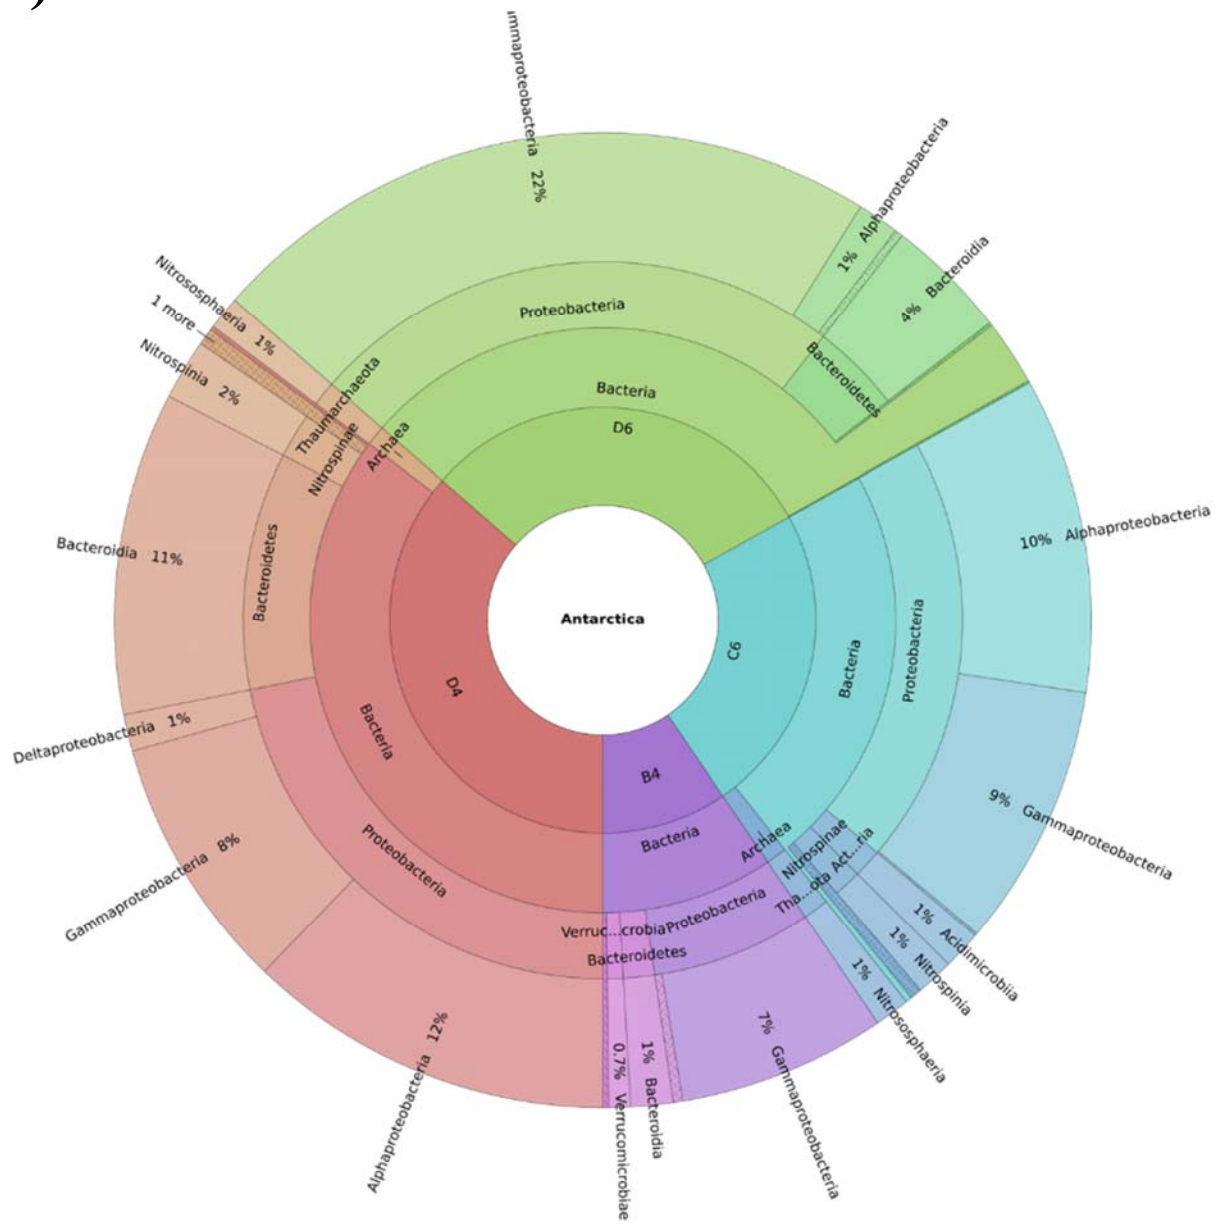

d)

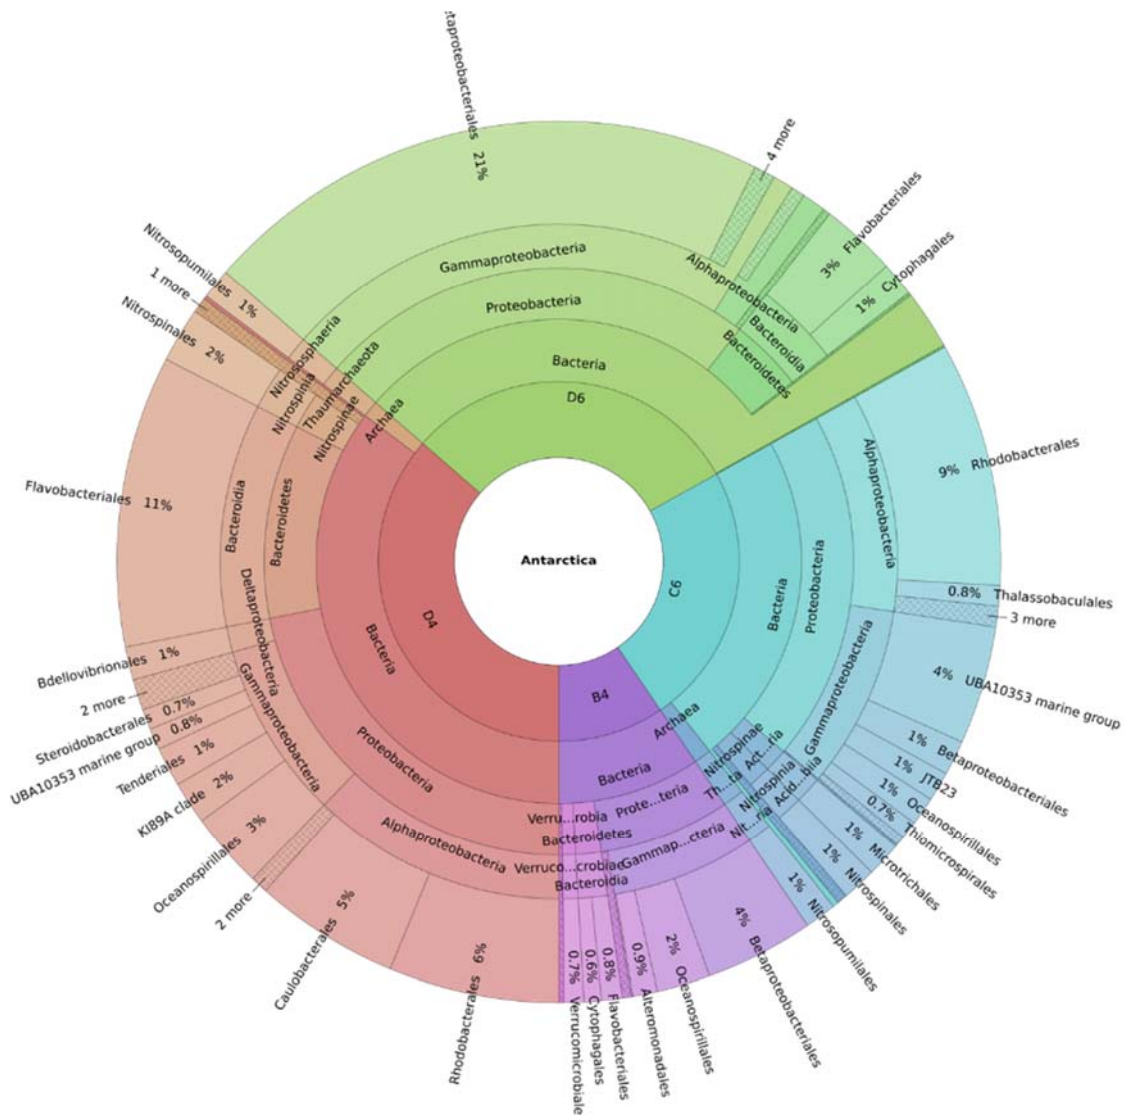



e)

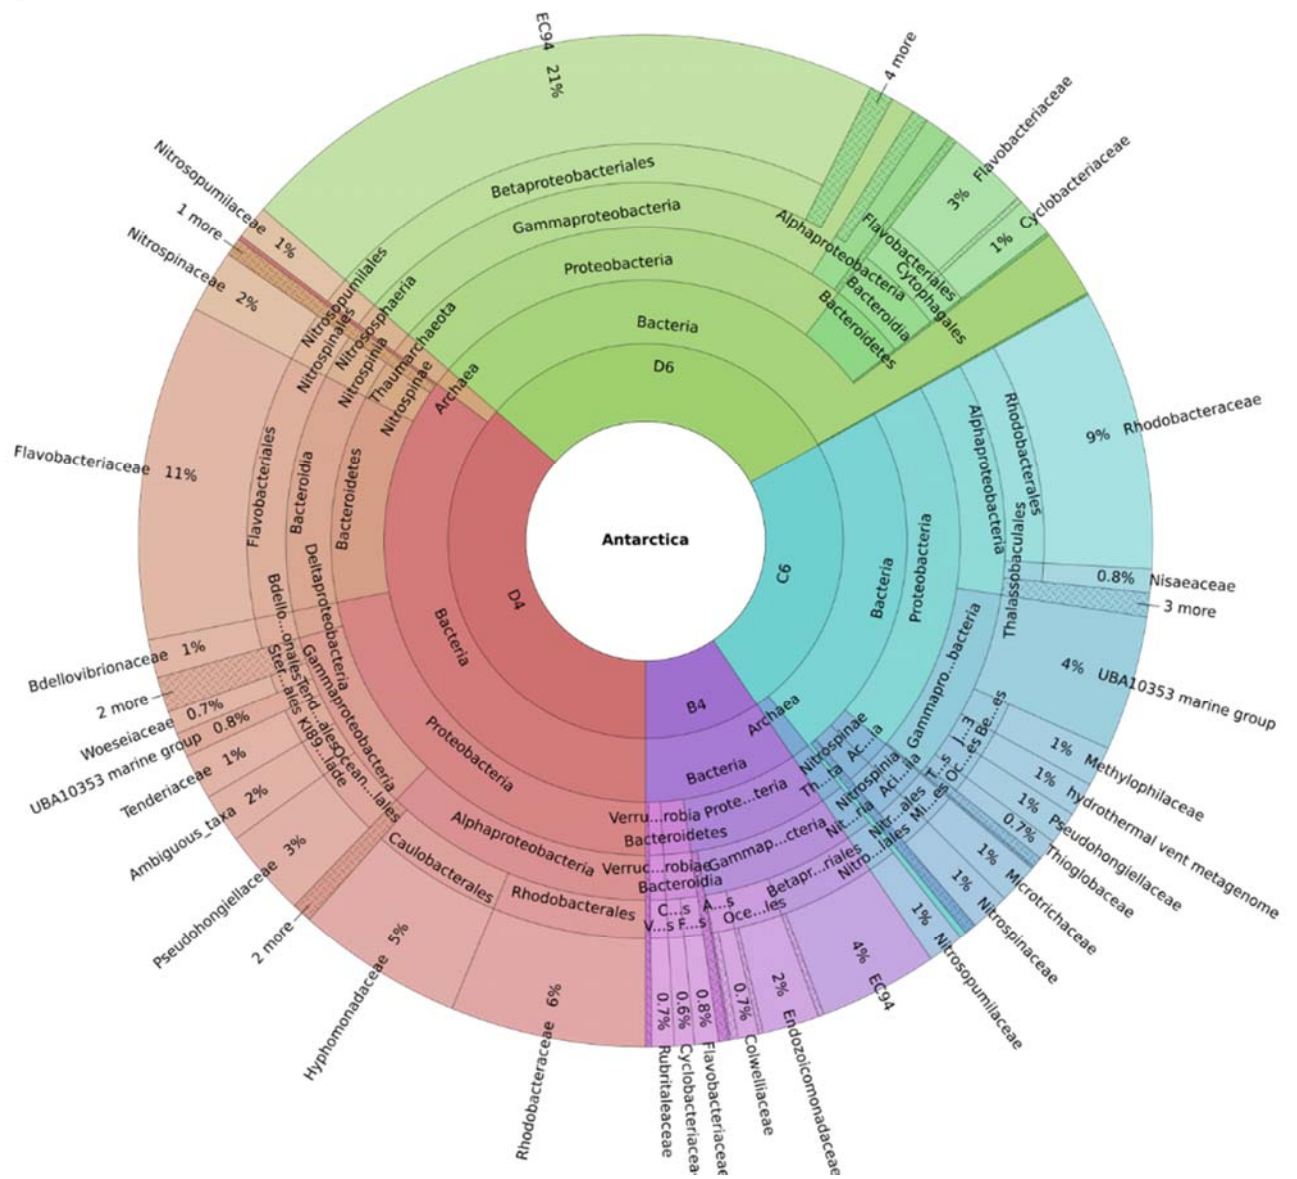



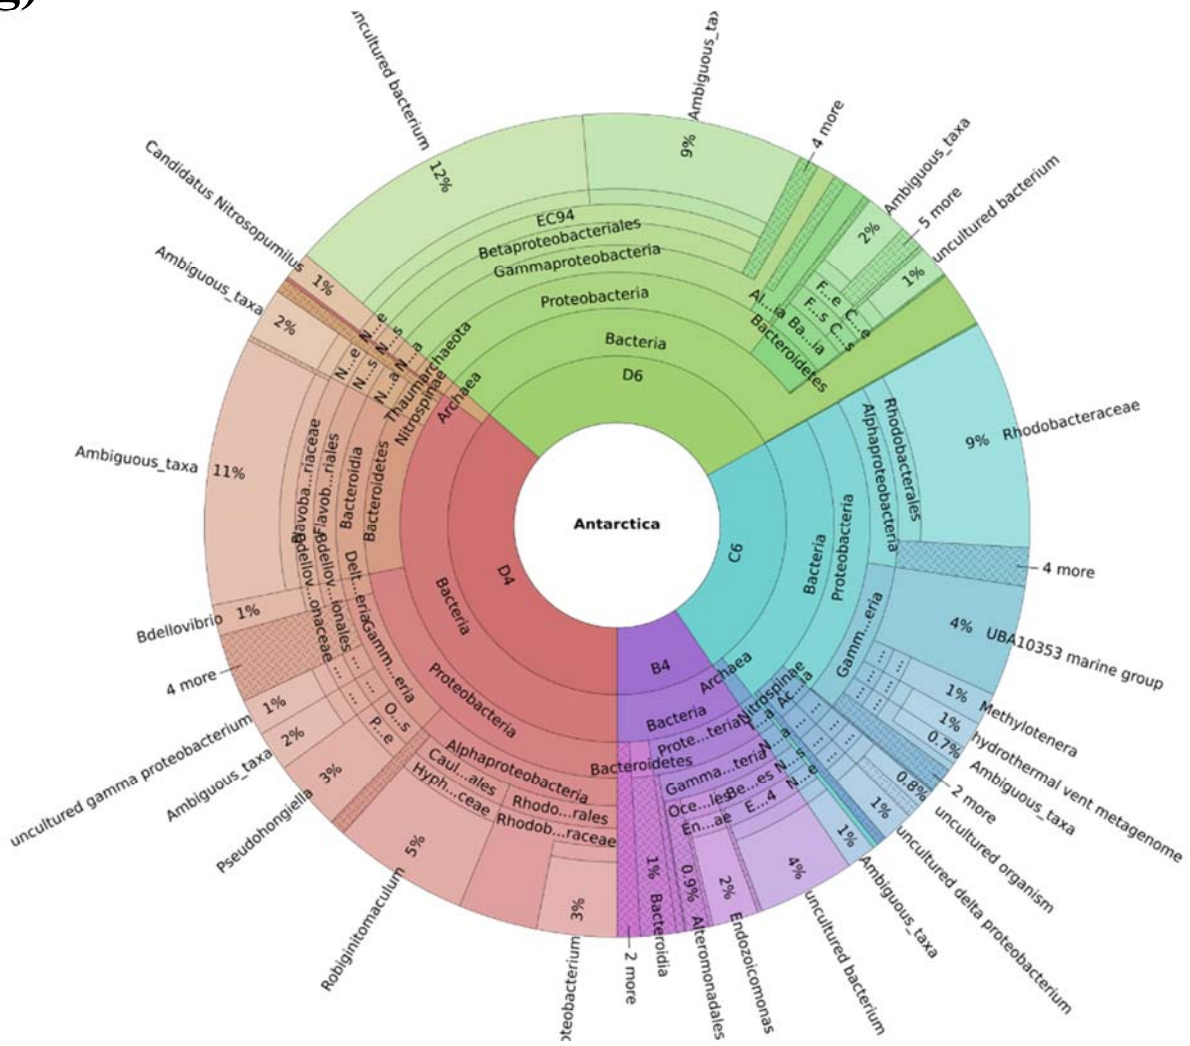

**Figure S6.** Distribution of ASV's frequencies.

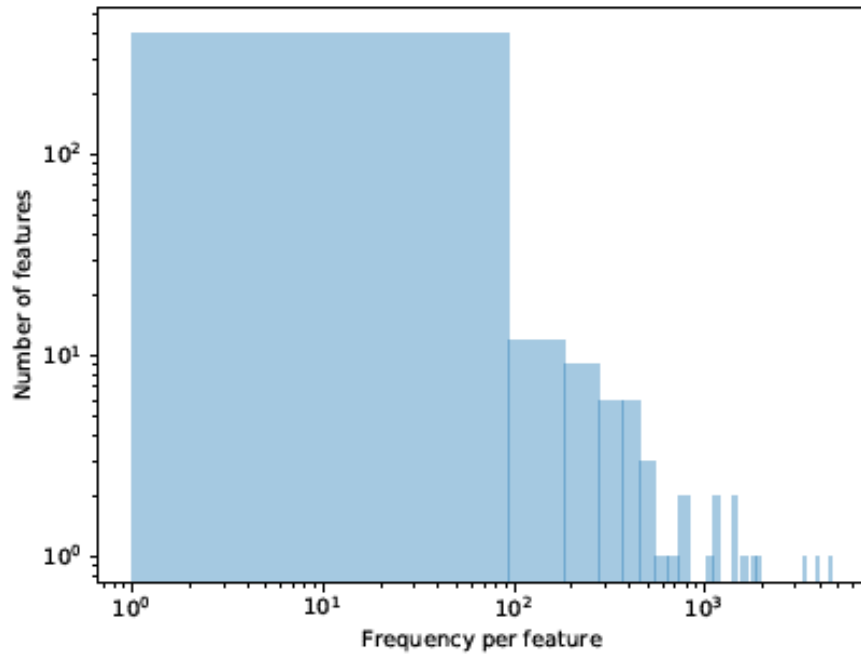

**Figure S7.** Distribution of ASV's frequencies for each sample (reported as a blue bar).

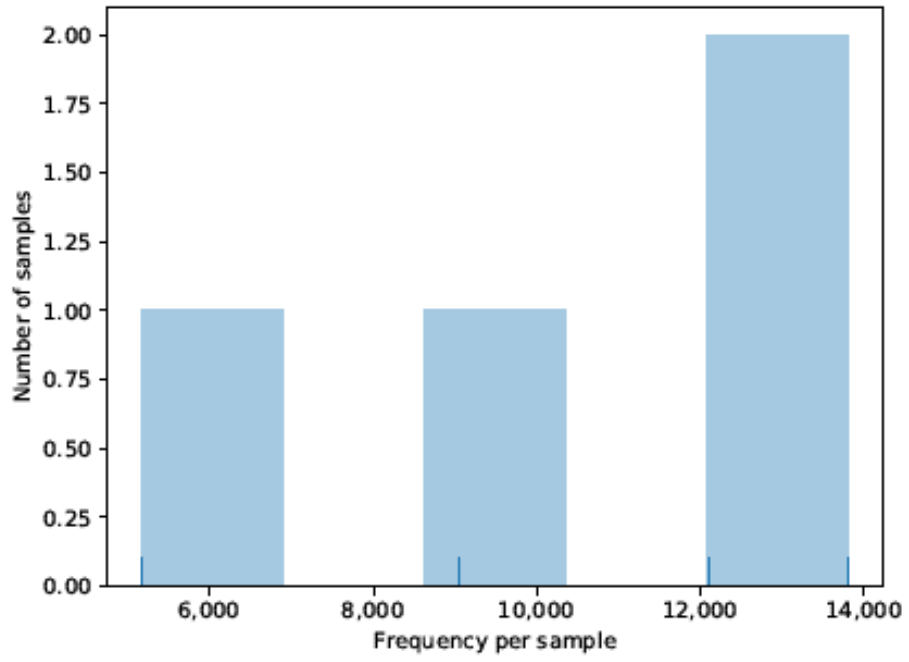

**Table S1.** BLAST results from B4 sponge (*Mycale (Oxymycale) acerata*). The primer names, sequence length in base pairs (bp), first hits (highlighted in bold), hits at low significance displaying the correct species (where present), query cover and identity percentages (%) were reported.

| Primers                   | Sequence length (bp) | BLAST results                                                                                                                                                                                                                                                       | Query cover (%) | Identity (%) |
|---------------------------|----------------------|---------------------------------------------------------------------------------------------------------------------------------------------------------------------------------------------------------------------------------------------------------------------|-----------------|--------------|
| A/B                       | 1700                 | <b><i>Mycale macilenta</i> voucher OCDN7203-O small subunit 18S ribosomal RNA gene, partial sequence</b>                                                                                                                                                            | 99              | 98           |
| 18S-AF/18S-BR             | 1700                 | <b><i>Mycale macilenta</i> voucher OCDN7203-O small subunit 18S ribosomal RNA gene, partial sequence</b>                                                                                                                                                            | 99              | 99           |
| RA2/ITS2.2                | 700                  | <b><i>Mycale grandis</i> isolate SPO4A small subunit ribosomal RNA gene, partial sequence; internal transcribed spacer 1, 5.8S ribosomal RNA gene, and internal transcribed spacer 2, complete sequence; and large subunit ribosomal RNA gene, partial sequence</b> | 61              | 81           |
| NL4F/NL4R                 | 1000                 | <b><i>Mycale macilenta</i> voucher NCI346 28S ribosomal RNA gene, partial sequence</b>                                                                                                                                                                              | 99              | 97           |
| PorCOI2fwd/<br>PorCOI2rev | 577                  | <b><i>Asbestopluma lycopodium</i> mitochondrial partial mRNA for cytochrome oxidase subunit 1 (COI gene), specimen voucher ZMBN103466</b>                                                                                                                           | 98              | 90           |
|                           |                      | <i>Mycale acerata</i> isolate Myc_HH71 cytochrome c oxidase subunit I (COX1) gene, partial cds; mitochondrial                                                                                                                                                       | 55              | 99           |
| dgLCO1490/<br>dgHCO2198   | 694                  | <b><i>Mycale acerata</i> cytochrome c oxidase subunit I (COI) gene, partial cds; mitochondrial</b>                                                                                                                                                                  | 91              | 99           |

**Table S2.** BLAST results from C6 sponge (*Haliclona (Rhizoniera) dancoi*). The primer names, sequence length in base pairs (bp), first hits (highlighted in bold), hits at low significance displaying the correct species (where present), query cover and identity percentages (%) were reported.

| Primers       | Sequence length (bp) | BLAST results                                                                             | Query cover (%) | Identity (%) |
|---------------|----------------------|-------------------------------------------------------------------------------------------|-----------------|--------------|
| 18S-AF/18S-BR | 1867                 | <b><i>Haliclona</i> sp. DS-2007a 18S ribosomal RNA gene, partial sequence</b>             | 97              | 92           |
| NL4F/NL4R     | 1144                 | <b><i>Amphimedon queenslandica</i> large subunit ribosomal RNA gene, partial sequence</b> | 99              | 90           |

**Table S3.** BLAST results from D4 sponge (*Hemigellius pilosus*). The primer names, sequence length in base pairs (bp), first hits (highlighted in bold), hits at low significance displaying the correct species (where present), query cover and identity percentages (%) were reported.

| Primers                   | Sequence length (bp) | BLAST results                                                                                                                 | Query cover (%) | Identity (%) |
|---------------------------|----------------------|-------------------------------------------------------------------------------------------------------------------------------|-----------------|--------------|
| PorCOI2fwd/<br>PorCOI2rev | 625                  | <b><i>Gelliodes wilsoni</i> cytochrome c oxidase subunit I (COX1) gene, partial cds; mitochondrial</b>                        | 99              | 94           |
| dgLCO1490/<br>dgHCO2198   | 572                  | <b><i>Hemigellius pilosus</i> mitochondrial partial COI gene for cytochrome oxidase subunit 1, specimen voucher NIWA29200</b> | 94              | 98           |



**Table S4.** BLAST results from D6 sponge (*Microxina sarai*). The primer names, sequence length in base pairs (bp), first hits (highlighted in bold), query cover and identity percentages (%) were reported.

| Primers                   | Sequence length (bp) | BLAST results                                                                                                                 | Query cover (%) | Identity (%) |
|---------------------------|----------------------|-------------------------------------------------------------------------------------------------------------------------------|-----------------|--------------|
| A/B                       | 1500                 | <b><i>Haliclona</i> sp. DS-2007a 18S ribosomal RNA gene, partial sequence</b>                                                 | 98              | 92           |
| 18S1/18S2                 | 1900                 | <b><i>Petrosia strongylata</i> voucher OCDN9767-Z small subunit 18S ribosomal RNA gene, partial sequence</b>                  | 94              | 90           |
| 18S-AF/18S-BR             | 1300                 | <b><i>Haliclona</i> sp. DS-2007a 18S ribosomal RNA gene, partial sequence</b>                                                 | 95              | 92           |
| NL4F/NL4R                 | 1100                 | <b><i>Amphimedon queenslandica</i> large subunit ribosomal RNA gene, partial sequence</b>                                     | 98              | 90           |
| PorCOI2fwd/<br>PorCOI2rev | 591                  | <b><i>Gelliodes wilsoni</i> cytochrome c oxidase subunit I (COX1) gene, partial cds; mitochondrial</b>                        | 96              | 94           |
| dgLCO1490/<br>dgHCO2198   | 623                  | <b><i>Niphatidae</i> sp. 3 PRT-2020 voucher TS4542 cytochrome c oxidase subunit I (COX1) gene, partial cds; mitochondrial</b> | 99              | 95           |

**Table S5.** ASVs found from *M. (Oxymycale) acerata* with percentage of confidence  $\geq 75\%$ .

| Feature ID                       | Number of sequences | Confidence  | Taxon                                                                                                                                                |
|----------------------------------|---------------------|-------------|------------------------------------------------------------------------------------------------------------------------------------------------------|
| a4ea6d60a8f9e63298a5ea75868d3c43 | 1427                | 0.912665256 | D_0__Bacteria;D_1__Proteobacteria;D_2__Gammaproteobacteria;D_3__Betaproteobacteriales;D_4__E C94;D_5__uncultured bacterium;D_6__uncultured bacterium |
| 9f1ed010890d69a37368ea5e92ad5ae2 | 378                 | 0.999816003 | D_0__Bacteria;D_1__Proteobacteria;D_2__Gammaproteobacteria;D_3__Oceanospirillales;D_4__Endoz oicomonadaceae;D_5__Endozoicomonas                      |
| 1b593a6300ad92a0d3c14fa1b1d769be | 210                 | 0.998855494 | D_0__Bacteria;D_1__Bacteroidetes;D_2__Bacteroidia;D_3__Cytophagales;D_4__Cyclobacteriaceae;D_5 __Fulvivirga;D_6__uncultured bacterium                |
| d1296951cd07ad936917eb5a529b8519 | 171                 | 0.999867479 | D_0__Bacteria;D_1__Proteobacteria;D_2__Gammaproteobacteria;D_3__Oceanospirillales;D_4__Endoz oicomonadaceae;D_5__Endozoicomonas                      |
| 62a2b95a760428a5dcc4142aa39cb8c5 | 136                 | 0.996765346 | D_0__Bacteria;D_1__Verrucomicrobia;D_2__Verrucomicrobiae;D_3__Verrucomicrobiales;D_4__Rubrita leaceae;D_5__Rubritalea;D_6__uncultured bacterium      |
| e2c1342958768738f33d30d8ad6dddaf | 136                 | 0.999992101 | D_0__Bacteria;D_1__Proteobacteria;D_2__Gammaproteobacteria;D_3__Alteromonadales;D_4__Colwel liaceae;D_5__Colwellia                                   |
| a1020a368dc2ed3acbfe0b52849310cf | 103                 | 0.889236536 | D_0__Bacteria;D_1__Bacteroidetes;D_2__Bacteroidia;D_3__Flavobacteriales;D_4__Flavobacteriaceae;D _5__Ulvibacter;Ambiguous_taxa                       |
| ad7c0f31a1c10c1c69ce29ca1a8fe9bc | 68                  | 0.999708203 | D_0__Bacteria;D_1__Proteobacteria;D_2__Gammaproteobacteria;D_3__Betaproteobacteriales;D_4__ Methylophilaceae;D_5__Methylotenera                      |
| f40efeb4eaab598159be6c09c53e1794 | 66                  | 0.985880058 | D_0__Bacteria;D_1__Proteobacteria;D_2__Gammaproteobacteria;D_3__Alteromonadales;D_4__Altero monadaceae;D_5__Paraglaciecola;Ambiguous_taxa            |
| 895f8d4d0116fba8ab4ace8506d42270 | 61                  | 0.999993017 | D_0__Bacteria;D_1__Bacteroidetes;D_2__Bacteroidia;D_3__Flavobacteriales;D_4__Flavobacteriaceae;D _5__Maritimimonas;D_6__uncultured marine bacterium  |
| 3c9e154bb7add5d96a146d47a50b0928 | 51                  | 0.999877938 | D_0__Bacteria;D_1__Proteobacteria;D_2__Gammaproteobacteria;D_3__Oceanospirillales;D_4__Endoz oicomonadaceae;D_5__Endozoicomonas                      |
| 96ed4932292a58087478ccb3a67eb52  | 50                  | 0.999999433 | D_0__Bacteria;D_1__Proteobacteria;D_2__Gammaproteobacteria;D_3__Oceanospirillales;D_4__Endoz oicomonadaceae;D_5__Endozoicomonas                      |
| 278fb2198b21befc38f8943ca61e98cc | 48                  | 0.95188884  | D_0__Bacteria;D_1__Verrucomicrobia;D_2__Verrucomicrobiae;D_3__Verrucomicrobiales;D_4__Rubrita leaceae;D_5__Rubritalea;D_6__uncultured bacterium      |
| ee870ce17e3f15f8901fd69b429fcef4 | 47                  | 0.999990415 | D_0__Bacteria;D_1__Proteobacteria;D_2__Gammaproteobacteria;D_3__Alteromonadales;D_4__Colwel liaceae;D_5__Colwellia                                   |

|                                  |    |             |                                                                                                                                                                             |
|----------------------------------|----|-------------|-----------------------------------------------------------------------------------------------------------------------------------------------------------------------------|
| b0622d44882b29138fe6e2d4d2ce5ad1 | 45 | 0.99985596  | D_0__Bacteria;D_1__Proteobacteria;D_2__Gammaproteobacteria;D_3__Alteromonadales;D_4__Colwelliaceae;D_5__Colwellia                                                           |
| 9d65f1d36e791afe1c55e4e5cd43fbe4 | 43 | 0.999999982 | D_0__Bacteria;D_1__Verrucomicrobia;D_2__Verrucomicrobiae;D_3__Verrucomicrobiales;D_4__Rubritaleaceae;D_5__Rubritalea;D_6__uncultured bacterium                              |
| fd1b630abd30a2d66d755191318cad6a | 34 | 0.999955984 | D_0__Bacteria;D_1__Proteobacteria;D_2__Alphaproteobacteria;D_3__Kordiimonadales;D_4__uncultured;D_5__uncultured alpha proteobacterium;D_6__uncultured alpha proteobacterium |
| b9a1e544e1001768214eab4d2456427b | 33 | 0.994559771 | D_0__Bacteria;D_1__Proteobacteria;D_2__Gammaproteobacteria;D_3__Oceanospirillales;D_4__Kangieliaceae;D_5__uncultured;Ambiguous_taxa                                         |
| b3cff3bb35803df4da9e0a622938098f | 30 | 0.941528817 | D_0__Bacteria;D_1__Bacteroidetes;D_2__Bacteroidia;D_3__Flavobacteriales;D_4__Flavobacteriaceae;D_5__Ulvibacter;Ambiguous_taxa                                               |
| b003e0a1d135733e3e047728e3f21bea | 29 | 0.998562648 | D_0__Bacteria;D_1__Bacteroidetes;D_2__Bacteroidia;D_3__Cytophagales;D_4__Cyclobacteriaceae;D_5__Fulvivirga;D_6__uncultured bacterium                                        |
| 40b18ed3bbfe833327078205d4f16471 | 28 | 0.9445629   | D_0__Bacteria;D_1__Actinobacteria;D_2__Acidimicrobia;D_3__Microtrichales;D_4__Microtrichaceae;D_5__uncultured;D_6__uncultured Acidimicrobiales bacterium                    |
| b75210954630df7794c0f6c01f047407 | 28 | 0.999674058 | D_0__Bacteria;D_1__Proteobacteria;D_2__Gammaproteobacteria;D_3__Oceanospirillales;D_4__Endozoicomonadaceae;D_5__Endozoicomonas                                              |
| e8550673c2ac62406b48621aff4f52f2 | 27 | 1           | D_0__Bacteria;D_1__Bacteroidetes;D_2__Bacteroidia;D_3__Flavobacteriales;D_4__Flavobacteriaceae                                                                              |
| 159593908836f364fb4f3c5e663a5e59 | 24 | 0.811485846 | D_0__Bacteria;D_1__Proteobacteria;D_2__Alphaproteobacteria;D_3__Rhodobacterales;D_4__Rhodobacteraceae;D_5__Roseobacter clade NAC11-7 lineage                                |
| 1cec8261e5fc06ca6b16ac7ac9d3664d | 24 | 0.999999808 | D_0__Bacteria;D_1__Proteobacteria;D_2__Gammaproteobacteria;D_3__Cellvibrionales;D_4__Spongiibacteraceae;D_5__Sinobacterium;D_6__uncultured bacterium                        |
| 2b80824766a33f8fd384da14c8117574 | 24 | 0.997598841 | D_0__Bacteria;D_1__Actinobacteria;D_2__Acidimicrobia;D_3__Microtrichales;D_4__Microtrichaceae;D_5__Sva0996 marine group;D_6__uncultured organism                            |
| 8a31bd6ef7a26c35b0206e8e0b852f74 | 24 | 0.999931828 | D_0__Bacteria;D_1__Bacteroidetes;D_2__Bacteroidia;D_3__Flavobacteriales;D_4__Flavobacteriaceae;D_5__Maritimimonas;D_6__uncultured marine bacterium                          |
| bcc6b5465440970c6c3c97757d3868a9 | 24 | 0.998767926 | D_0__Bacteria;D_1__Proteobacteria;D_2__Gammaproteobacteria;D_3__Oceanospirillales;D_4__Nitriolaceae;D_5__uncultured;D_6__uncultured bacterium                               |
| 0aebc7c8b90e3922ae2960d6bc6ba3f8 | 23 | 0.968351558 | D_0__Bacteria;D_1__Proteobacteria;D_2__Gammaproteobacteria;D_3__Alteromonadales;D_4__Moritellaceae;D_5__Moritella;Ambiguous_taxa                                            |
| 6edc5627c661f42de7cef55aafae77ae | 22 | 0.910915424 | D_0__Bacteria;D_1__Bacteroidetes;D_2__Bacteroidia;D_3__Flavobacteriales;D_4__Flavobacteriaceae;D_5__Algibacter;Ambiguous_taxa                                               |

|                                  |    |             |                                                                                                                                                              |
|----------------------------------|----|-------------|--------------------------------------------------------------------------------------------------------------------------------------------------------------|
| 28a9b6d8a9e659f3ba901248608300b3 | 21 | 0.878100476 | D_0__Bacteria;D_1__Verrucomicrobia;D_2__Verrucomicrobiae;D_3__Verrucomicrobiales;D_4__Rubrita<br>leaceae;D_5__Persicirhabdus;Ambiguous_taxa                  |
| 6a5b30e33023c1d5a18cbcd55b2c3998 | 21 | 0.964920543 | D_0__Bacteria;D_1__Proteobacteria;D_2__Alphaproteobacteria;D_3__Rhodobacterales;D_4__Rhodoba<br>cteraceae;D_5__Amylibacter                                   |
| c16b5119dc858091596759269edccac0 | 21 | 0.900557567 | D_0__Bacteria;D_1__Verrucomicrobia;D_2__Verrucomicrobiae;D_3__Verrucomicrobiales;D_4__Rubrita<br>leaceae;D_5__Roseibacillus;D_6__uncultured marine bacterium |
| 7b5dea034b895ccfdd11548ca5b5371c | 20 | 0.932325934 | D_0__Bacteria;D_1__Proteobacteria;D_2__Alphaproteobacteria;D_3__Rhodobacterales;D_4__Rhodoba<br>cteraceae;D_5__Sulfitobacter;Ambiguous_taxa                  |
| c3dda5a58756b031c9e08df9b53b7224 | 20 | 0.997756169 | D_0__Bacteria;D_1__Proteobacteria;D_2__Alphaproteobacteria;D_3__Rhizobiales;D_4__Rhizobiaceae;<br>D_5__Pseudahrensia;D_6__uncultured bacterium               |
| cc642e360e47b363c9bbd221d2a54399 | 20 | 0.920611496 | D_0__Bacteria;D_1__Bacteroidetes;D_2__Bacteroidia;D_3__Flavobacteriales;D_4__Flavobacteriaceae;D<br>_5__Maribacter;Ambiguous_taxa                            |
| ccb67f3a797ef786dc0c42cf3b8bd220 | 20 | 0.999963971 | D_0__Bacteria;D_1__Proteobacteria;D_2__Gammaproteobacteria;D_3__Alteromonadales;D_4__Colwel<br>liaceae;D_5__Colwellia                                        |
| d49ab65491384d592ce52ceb40e4482a | 20 | 0.999653457 | D_0__Bacteria;D_1__Actinobacteria;D_2__Acidimicrobia;D_3__Microtrichales;D_4__Microtrichaceae;D<br>_5__Sva0996 marine group                                  |
| 3fd90259319c61629859866ddf0d2905 | 19 | 0.83117912  | D_0__Bacteria;D_1__Verrucomicrobia;D_2__Verrucomicrobiae;D_3__Verrucomicrobiales;D_4__Rubrita<br>leaceae;D_5__Rubritalea;D_6__uncultured bacterium           |
| ad9166d7dd6d9dfb179101bd56bdc59e | 19 | 0.745946007 | D_0__Bacteria;D_1__Proteobacteria;D_2__Alphaproteobacteria;D_3__Rhodobacterales;D_4__Rhodoba<br>cteraceae;D_5__Loktanelia;D_6__uncultured bacterium          |
| b4d48f6625d60557067aa2d5f1c3e4ed | 19 | 0.81326208  | D_0__Bacteria;D_1__Bacteroidetes;D_2__Bacteroidia;D_3__Flavobacteriales;D_4__Flavobacteriaceae;D<br>_5__Dokdonia;Ambiguous_taxa                              |
| faa53b1ce37beb0ae77266df153c2028 | 19 | 0.968333622 | D_0__Bacteria;D_1__Proteobacteria;D_2__Gammaproteobacteria;D_3__Cellvibrionales;D_4__Spongiib<br>acteraceae;D_5__uncultured;D_6__uncultured bacterium        |
| 7d7689c3b0b3830f32c36ab568c7fee3 | 18 | 0.999998014 | D_0__Bacteria;D_1__Proteobacteria;D_2__Gammaproteobacteria;D_3__Oceanospirillales;D_4__Endoz<br>oicomonadaceae;D_5__Endozoicomonas                           |
| aecb5b60b758d3e80787bd3a707e3bbd | 18 | 0.752265014 | D_0__Bacteria;D_1__Proteobacteria;D_2__Alphaproteobacteria;D_3__Rhodobacterales;D_4__Rhodoba<br>cteraceae;D_5__Roseobacter;Ambiguous_taxa                    |
| 047b36c4f0e57bd73d8377e4a9941a15 | 17 | 0.999857817 | D_0__Bacteria;D_1__Proteobacteria;D_2__Gammaproteobacteria;D_3__Alteromonadales;D_4__Colwel<br>liaceae;D_5__Colwellia                                        |
| 7f45393e29fb7e75e281f15439a19095 | 17 | 0.81311773  | D_0__Bacteria;D_1__Proteobacteria;D_2__Gammaproteobacteria;D_3__Cellvibrionales;D_4__Halieace<br>ae;D_5__Halioglobus                                         |

|                                  |    |             |                                                                                                                                                                      |
|----------------------------------|----|-------------|----------------------------------------------------------------------------------------------------------------------------------------------------------------------|
| d08bc4fcfc17cc6b2be189153c9064d5 | 17 | 0.985606948 | D_0__Bacteria;D_1__Proteobacteria;D_2__Gammaproteobacteria;D_3__BD7-8                                                                                                |
| e3e9faf4f891661bb18d96277f1c0e9e | 17 | 1           | D_0__Bacteria;D_1__Bacteroidetes;D_2__Bacteroidia;D_3__Flavobacteriales;D_4__Flavobacteriaceae                                                                       |
| e420266aac740dddc12375f0765dcc64 | 17 | 0.997255745 | D_0__Bacteria;D_1__Verrucomicrobia;D_2__Verrucomicrobiae;D_3__Verrucomicrobiales;D_4__Rubrita<br>leaceae;D_5__Rubritalea;D_6__uncultured bacterium                   |
| 0125be2e39c35fcd6c36d7f5e82cdf7  | 16 | 0.977061758 | D_0__Bacteria;D_1__Proteobacteria;D_2__Gammaproteobacteria;D_3__Oceanospirillales;D_4__Kangie<br>llaceae;D_5__uncultured;Ambiguous_taxa                              |
| 4a36b1a09856f0a523ca7af7515ba242 | 16 | 0.923354141 | D_0__Bacteria;D_1__Proteobacteria;D_2__Gammaproteobacteria;D_3__Cellvibrionales;D_4__Microbul<br>biferaceae;D_5__Microbulbifer;Ambiguous_taxa                        |
| 590d05f47d955cd512cd0eb539458e3f | 16 | 1           | D_0__Bacteria;D_1__Bacteroidetes;D_2__Bacteroidia;D_3__Chitinophagales;D_4__Saprosiraceae;D_5<br>__Lewinella                                                         |
| 5f831485aa9ffe3e39cc763379204883 | 16 | 0.999950333 | D_0__Bacteria;D_1__Bacteroidetes;D_2__Bacteroidia;D_3__Flavobacteriales;D_4__Flavobacteriaceae;D<br>_5__Maritimimonas;D_6__uncultured marine bacterium               |
| 84ab1e0355d6a4bbe207b17e384c9248 | 16 | 0.999999985 | D_0__Bacteria;D_1__Planctomycetes;D_2__Planctomycetacia;D_3__Pirellulales;D_4__Pirellulaceae;D_5<br>__Blastopirellula                                                |
| 90ad0789fa1f71092d9987d92fc8b173 | 16 | 0.99999795  | D_0__Bacteria;D_1__Spirochaetes;D_2__Spirochaetia;D_3__Spirochaetales;D_4__Spirochaetaceae;D_5<br>__Spirochaeta 2;D_6__uncultured marine bacterium                   |
| 16cf0f7f0c048095d5c69fabf0868c8a | 15 | 0.98485092  | D_0__Bacteria;D_1__Proteobacteria;D_2__Alphaproteobacteria;D_3__Rhodobacterales;D_4__Rhodoba<br>cteraceae;D_5__Sulfitobacter;D_6__uncultured marine bacterium        |
| 4724bbbe36903e114d17ef5229ae49ba | 15 | 0.92918385  | D_0__Bacteria;D_1__Bacteroidetes;D_2__Bacteroidia;D_3__Flavobacteriales;D_4__Flavobacteriaceae;D<br>_5__Winogradskyella;Ambiguous_taxa                               |
| 7d8305421802790dbeab049b9d75cae2 | 15 | 0.766163888 | D_0__Bacteria;D_1__Proteobacteria;D_2__Gammaproteobacteria;D_3__Gammaproteobacteria<br>Incertae Sedis;D_4__Unknown Family;D_5__Marinicella;D_6__uncultured bacterium |
| bdb4d422f0622606ea95a4dd1b17b1d7 | 15 | 0.920158259 | D_0__Bacteria;D_1__Proteobacteria;D_2__Gammaproteobacteria;D_3__Alteromonadales;D_4__Altero<br>monadaceae;D_5__Paraglaciecola;Ambiguous_taxa                         |
| d0265845e2a2b207cacb4fe7866e7dcd | 15 | 0.856298732 | D_0__Bacteria;D_1__Proteobacteria;D_2__Gammaproteobacteria;D_3__Oceanospirillales;D_4__Pseud<br>ohongiellaceae;D_5__Pseudohongiella;D_6__uncultured marine bacterium |
| ce42b14845e10ad958ca1cb53045dbca | 14 | 0.995966837 | D_0__Bacteria;D_1__Proteobacteria;D_2__Gammaproteobacteria;D_3__Alteromonadales;D_4__Colwel<br>liaceae;D_5__Colwellia                                                |
| 2062b1a374f102a30880e12b90cc1e89 | 13 | 1           | D_0__Bacteria;D_1__Proteobacteria;D_2__Alphaproteobacteria;D_3__Rhodobacterales;D_4__Rhodoba<br>cteraceae                                                            |

|                                  |    |             |                                                                                                                                                           |
|----------------------------------|----|-------------|-----------------------------------------------------------------------------------------------------------------------------------------------------------|
| 4edb032cf8d7c83d2902426e792749d5 | 13 | 0.983474655 | D_0__Bacteria;D_1__Proteobacteria;D_2__Gammaproteobacteria;D_3__Nitrosococcales;D_4__Methylophagaceae;D_5__uncultured;Ambiguous_taxa                      |
| 52b4f46250c3263f256229b5954b7201 | 13 | 0.93433736  | D_0__Bacteria;D_1__Bacteroidetes;D_2__Bacteroidia;D_3__Flavobacteriales;D_4__Cryomorphaceae;D_5__uncultured;Ambiguous_taxa                                |
| 5b89b8b9b143bd19e2f738356fd40d87 | 13 | 0.978871778 | D_0__Bacteria;D_1__Proteobacteria;D_2__Gammaproteobacteria;D_3__Thiotrichales;D_4__Thiotrichaceae;D_5__Leucothrix;Ambiguous_taxa                          |
| 8101484a5c241eb9197f3f5ed275e28d | 13 | 0.999999995 | D_0__Bacteria;D_1__Proteobacteria;D_2__Alphaproteobacteria;D_3__Rhodobacterales;D_4__Rhodobacteraceae                                                     |
| a790226f2d39a6b1eacb449e2b6f6e26 | 13 | 0.993397935 | D_0__Bacteria;D_1__Proteobacteria;D_2__Gammaproteobacteria;D_3__Oceanospirillales;D_4__Kangieliaceae;D_5__uncultured;Ambiguous_taxa                       |
| ce64d54ce8204b1e5a227ad9d260bfe2 | 13 | 0.999975375 | D_0__Bacteria;D_1__Proteobacteria;D_2__Gammaproteobacteria;D_3__Betaproteobacteriales;D_4__Methylophilaceae;D_5__Methylotenera                            |
| d5f424da453819b39fe6c6bf2b901997 | 13 | 0.984993474 | D_0__Bacteria;D_1__Proteobacteria;D_2__Gammaproteobacteria;D_3__Oceanospirillales;D_4__Kangieliaceae;D_5__uncultured;Ambiguous_taxa                       |
| ee0f5caff94365896ef095e26d1fed6d | 13 | 0.749932806 | D_0__Bacteria;D_1__Proteobacteria;D_2__Alphaproteobacteria;D_3__SAR11 clade;D_4__Clade I;D_5__Clade Ia                                                    |
| 4222f44306fe312dc21c42d676f9ce65 | 12 | 0.986315118 | D_0__Bacteria;D_1__Verrucomicrobia;D_2__Verrucomicrobiae;D_3__Verrucomicrobiales;D_4__Rubritaleaceae;D_5__Persicirhabdus;D_6__uncultured bacterium        |
| 5d9835c028d02be320fdd0c95eb23f4f | 12 | 0.82943598  | D_0__Bacteria;D_1__Bacteroidetes;D_2__Bacteroidia;D_3__Flavobacteriales;D_4__Flavobacteriaceae;D_5__Polaribacter 1;Ambiguous_taxa                         |
| 646a76fd0777100707a2af1a3344be46 | 12 | 0.998330898 | D_0__Bacteria;D_1__Proteobacteria;D_2__Alphaproteobacteria;D_3__Rhodospirillales;D_4__Magnetospiraceae;D_5__Magnetospira;D_6__uncultured marine bacterium |
| 8248b5ca3cabf57e63291c0250b18cd8 | 12 | 0.928013931 | D_0__Bacteria;D_1__Proteobacteria;D_2__Gammaproteobacteria;D_3__Alteromonadales;D_4__Shewanellaceae;D_5__Psychrobium;D_6__uncultured bacterium            |
| b4abd5eea6527558dc4cc070b6b70032 | 12 | 0.891154075 | D_0__Bacteria;D_1__Actinobacteria;D_2__Acidimicrobia;D_3__Microtrichales;D_4__Ilumatobacteraceae;D_5__Ilumatobacter;Ambiguous_taxa                        |
| d99a727d18d025d687533115516c7cbb | 12 | 0.999999999 | D_0__Bacteria                                                                                                                                             |
| fac52f1f824f78b6cf50a3268831ae82 | 12 | 0.879684082 | D_0__Bacteria;D_1__Actinobacteria;D_2__Acidimicrobia;D_3__Microtrichales;D_4__Ilumatobacteraceae;D_5__Ilumatobacter;Ambiguous_taxa                        |
| 0243483399bf33f0de6658ac1b2258c8 | 11 | 0.782258864 | D_0__Bacteria;D_1__Proteobacteria;D_2__Alphaproteobacteria;D_3__Rhodobacterales;D_4__Rhodobacteraceae;D_5__Loktanella                                     |

|                                  |    |             |                                                                                                                                                                   |
|----------------------------------|----|-------------|-------------------------------------------------------------------------------------------------------------------------------------------------------------------|
| 46c5e74f2284235ed905dc88eb991569 | 11 | 0.988708557 | D_0__Bacteria;D_1__Proteobacteria;D_2__Gammaproteobacteria;D_3__Oceanospirillales;D_4__Kangieliaceae;D_5__uncultured;Ambiguous_taxa                               |
| 535b9ebd7316c464b0b200ab675833db | 11 | 0.86318965  | D_0__Bacteria;D_1__Proteobacteria;D_2__Alphaproteobacteria;D_3__Rhodobacterales;D_4__Rhodobacteraceae;D_5__Amylibacter                                            |
| a007abe4d82829eb7626d11282a92935 | 11 | 0.999999988 | D_0__Bacteria;D_1__Planctomycetes;D_2__Planctomycetacia;D_3__Pirellulales;D_4__Pirellulaceae;D_5__Blastopirellula                                                 |
| b23c69c6735213b55453abe9642b1af1 | 11 | 0.999386499 | D_0__Bacteria;D_1__Bacteroidetes;D_2__Bacteroidia;D_3__Chitinophagales;D_4__Saprospiraceae;D_5__Lewinella;D_6__uncultured marine bacterium                        |
| cd9102d8a7aa4d9602a128a83ac80491 | 11 | 0.960424736 | D_0__Bacteria;D_1__Bacteroidetes;D_2__Bacteroidia;D_3__Flavobacteriales;D_4__Flavobacteriaceae;D_5__Winogradskyella;Ambiguous_taxa                                |
| d966d20d69c1c82424702adf6e07f488 | 11 | 0.999638568 | D_0__Bacteria;D_1__Bacteroidetes;D_2__Bacteroidia;D_3__Cytophagales;D_4__Cyclobacteriaceae;D_5__uncultured;D_6__uncultured bacterium                              |
| e9ca6bfaab0bfb3275a138393fb49674 | 11 | 0.885402338 | D_0__Bacteria;D_1__Proteobacteria;D_2__Gammaproteobacteria;D_3__Arenicellales;D_4__Arenicellaceae;D_5__Arenicella;Ambiguous_taxa                                  |
| f0e6eac9bd44f060d5f5ccc49cdbc395 | 11 | 0.96119322  | D_0__Bacteria;D_1__Proteobacteria;D_2__Gammaproteobacteria;D_3__Thiohalorhabdadales;D_4__Thiohalorhabdaceae;D_5__Granulosococcus;D_6__uncultured marine bacterium |
| fda1d23e0f057b10e04e90852eb64121 | 11 | 0.981348293 | D_0__Bacteria;D_1__Proteobacteria;D_2__Alphaproteobacteria;D_3__Sneathiellales;D_4__Sneathiellaceae;D_5__Sneathiella;D_6__uncultured bacterium                    |
| 0696faca32374e98e0bc77e4d5bd1bc2 | 10 | 0.999999971 | D_0__Bacteria;D_1__Proteobacteria;D_2__Alphaproteobacteria;D_3__Rhodobacterales;D_4__Rhodobacteraceae                                                             |
| 3161bf8d4e50e0cc41ed28dfadb75ee2 | 10 | 0.892241844 | D_0__Bacteria;D_1__Proteobacteria;D_2__Alphaproteobacteria;D_3__Rhizobiales;D_4__Rhizobiaceae;D_5__uncultured;Ambiguous_taxa                                      |
| 45d75404c5a89925e20d9a4d893e59f1 | 10 | 0.992257377 | D_0__Bacteria;D_1__Proteobacteria;D_2__Gammaproteobacteria;D_3__Gammaproteobacteria Incertae Sedis;D_4__Unknown Family;D_5__Marinicella;Ambiguous_taxa            |
| 4abb22cdd91561294fd1e8fd67604648 | 10 | 0.763183871 | D_0__Bacteria;D_1__Bacteroidetes;D_2__Bacteroidia;D_3__Flavobacteriales;D_4__Flavobacteriaceae;D_5__[Polaribacter] huanghezhanensis;Ambiguous_taxa                |
| 6bbbd6e7960913833d03b6c0258bc7fb | 10 | 0.999997674 | D_0__Bacteria;D_1__Proteobacteria;D_2__Gammaproteobacteria                                                                                                        |
| 9ae4b8e315c734f70e112ac5da49f2d2 | 10 | 0.967388972 | D_0__Bacteria;D_1__Proteobacteria;D_2__Gammaproteobacteria;D_3__Arenicellales;D_4__Arenicellaceae;D_5__Arenicella;D_6__uncultured gamma proteobacterium           |
| d2c7ce967205a06fd70e3e3ec8972711 | 10 | 0.908992998 | D_0__Bacteria;D_1__Proteobacteria;D_2__Gammaproteobacteria;D_3__Thiotrichales;D_4__Thiotrichaceae;D_5__Thiothrix;Ambiguous_taxa                                   |

|                                  |    |             |                                                                                                                                                                                  |
|----------------------------------|----|-------------|----------------------------------------------------------------------------------------------------------------------------------------------------------------------------------|
| d86f57d65d0302308bb4f571a88ba49c | 10 | 0.999999997 | D_0__Bacteria;D_1__Proteobacteria;D_2__Deltaproteobacteria;D_3__NB1-j                                                                                                            |
| de9232f2da52576b10923892d9c5e458 | 10 | 0.969250635 | D_0__Bacteria;D_1__Planctomycetes;D_2__Pla4 lineage;D_3__uncultured bacterium;D_4__uncultured bacterium;D_5__uncultured bacterium;D_6__uncultured bacterium                      |
| ea7e0dea2b1f4768ca6e0b237286f9ef | 10 | 0.986328456 | D_0__Bacteria;D_1__Proteobacteria;D_2__Alphaproteobacteria;D_3__Rhizobiales;D_4__Hyphomicrobiaceae;D_5__Filomicrobium;Ambiguous_taxa                                             |
| ece89bff980b08b04d6f8dbe287592c3 | 10 | 0.999999069 | D_0__Bacteria;D_1__Epsilonbacteraeota;D_2__Campylobacteria;D_3__Campylobacteriales;D_4__Arcobacteraceae;D_5__Arcobacter                                                          |
| f7119682fee25ac95e6ba65510ff35c3 | 10 | 0.999999975 | D_0__Bacteria;D_1__Proteobacteria;D_2__Alphaproteobacteria;D_3__Sphingomonadales;D_4__Sphingomonadaceae                                                                          |
| fe6b598825e6dece979bdbc18a10010f | 10 | 0.809945138 | D_0__Bacteria;D_1__Bacteroidetes;D_2__Bacteroidia;D_3__Flavobacteriales;D_4__Flavobacteriaceae;D_5__Zobellia;Ambiguous_taxa                                                      |
| 1810c361b5f532d3e1fcc13936d9de2f | 9  | 0.999997998 | D_0__Bacteria;D_1__Bacteroidetes;D_2__Bacteroidia;D_3__Cytophagales;D_4__Cyclobacteriaceae;D_5__Reichenbachiella                                                                 |
| 5e68f782c00efaf729c4ccd474450acf | 9  | 0.979549727 | D_0__Bacteria;D_1__Proteobacteria;D_2__Gammaproteobacteria;D_3__OM182 clade;D_4__uncultured bacterium;D_5__uncultured bacterium;D_6__uncultured bacterium                        |
| 75e665d14cc29ed1ba519d7ee7016480 | 9  | 0.999999493 | D_0__Bacteria;D_1__Bacteroidetes;D_2__Bacteroidia;D_3__Flavobacteriales;D_4__Cryomorphaeae;D_5__Cryomorpha;D_6__uncultured deep-sea bacterium                                    |
| 9e4bb52a30262dd18e9cc6ee7a51b08f | 9  | 0.943042595 | D_0__Bacteria;D_1__Proteobacteria;D_2__Alphaproteobacteria;D_3__Micavibrionales;D_4__Micavibrionaceae;D_5__uncultured;D_6__uncultured bacterium                                  |
| a5577541cbf99c61a853c834987ac17d | 9  | 1           | D_0__Bacteria;D_1__Proteobacteria;D_2__Gammaproteobacteria;D_3__Gammaproteobacteria Incertae Sedis;D_4__Unknown Family;D_5__Marinicella                                          |
| c5b9ab8efdd93dbb18591809e7482ac4 | 9  | 0.999994524 | D_0__Bacteria;D_1__Proteobacteria;D_2__Gammaproteobacteria;D_3__Thiotrichales;D_4__Thiotrichaceae;D_5__Cocleimonas                                                               |
| ed347145ab935ef912e1f90fe9590298 | 9  | 0.886294614 | D_0__Bacteria;D_1__Proteobacteria;D_2__Gammaproteobacteria;D_3__Alteromonadales;D_4__Colwelliaceae;D_5__Colwellia                                                                |
| fa563495ba0f5215a6a8403ec332132d | 9  | 0.890569128 | D_0__Bacteria;D_1__Proteobacteria;D_2__Alphaproteobacteria;D_3__Rhodobacterales;D_4__Rhodobacteraceae;D_5__Loktanella                                                            |
| 04b637f3c78c015d30b30f5b5168eddd | 8  | 0.992069762 | D_0__Bacteria;D_1__Verrucomicrobia;D_2__Verrucomicrobiae;D_3__Verrucomicrobiales;D_4__DEV007;D_5__uncultured Verrucomicrobia bacterium;D_6__uncultured Verrucomicrobia bacterium |
| 0d42c6bc61177509c486c8ca0ca148c3 | 8  | 0.768296898 | D_0__Bacteria;D_1__Bacteroidetes;D_2__Bacteroidia;D_3__Flavobacteriales;D_4__Schleiferiaceae;D_5__Schleiferia;D_6__uncultured Bacteroidetes bacterium                            |



|                                  |   |             |                                                                                                                                                    |
|----------------------------------|---|-------------|----------------------------------------------------------------------------------------------------------------------------------------------------|
| 1f886dfa8f6136eab4660b909667dea0 | 8 | 0.945078418 | D_0__Bacteria;D_1__Bacteroidetes;D_2__Bacteroidia;D_3__Cytophagales;D_4__Cyclobacteriaceae;D_5__Fabibacter;Ambiguous_taxa                          |
| 2b27a33e6824822674ccf9d01b914d57 | 8 | 0.999611345 | D_0__Bacteria;D_1__Bacteroidetes;D_2__Bacteroidia;D_3__Chitinophagales;D_4__Saprospiraceae;D_5__Rubidimonas;D_6__uncultured bacterium              |
| 338ee77aa8b156ae36c5afb123bb1753 | 8 | 0.956607869 | D_0__Bacteria;D_1__Proteobacteria;D_2__Gammaproteobacteria;D_3__Arenicellales;D_4__Arenicellaceae;D_5__Arenicella;D_6__uncultured bacterium        |
| 51a5de4227edafec4841d560fb4ea06b | 8 | 0.999998197 | D_0__Bacteria;D_1__Proteobacteria;D_2__Gammaproteobacteria;D_3__Oceanospirillales;D_4__Pseudohongiellaceae;D_5__Pseudohongiella                    |
| 537a2abd146168ac7581149542b319e6 | 8 | 0.806271184 | D_0__Bacteria;D_1__Bacteroidetes;D_2__Bacteroidia;D_3__Flavobacteriales;D_4__Flavobacteriaceae;D_5__Maribacter                                     |
| 64baf572d00835f3cb89cbae732974a0 | 8 | 0.999972029 | D_0__Bacteria;D_1__Bacteroidetes;D_2__Bacteroidia;D_3__Flavobacteriales;D_4__Flavobacteriaceae;D_5__Aquibacter                                     |
| 70ec781c936311855ea407954453c92d | 8 | 0.998960065 | D_0__Bacteria;D_1__Bacteroidetes;D_2__Bacteroidia;D_3__Flavobacteriales;D_4__Flavobacteriaceae;D_5__Winogradskyella                                |
| 7c48952a1bb1a9df5f303579e6f7771f | 8 | 0.982926121 | D_0__Bacteria;D_1__Verrucomicrobia;D_2__Verrucomicrobiae;D_3__Verrucomicrobiales;D_4__Rubritaleaceae;D_5__Persicirhabdus;D_6__uncultured bacterium |
| af9c9edf8abdefd03492b10b0bd864bb | 8 | 0.981213681 | D_0__Bacteria;D_1__Proteobacteria;D_2__Gammaproteobacteria;D_3__Alteromonadales;D_4__Alteromonadaceae;D_5__Paraglaciecola;Ambiguous_taxa           |
| b99d6738a0771a81b47cab4575e57b2b | 8 | 0.991838    | D_0__Bacteria;D_1__Bacteroidetes;D_2__Bacteroidia;D_3__Flavobacteriales;D_4__Schleiferiaceae;D_5__Schleiferia;Ambiguous_taxa                       |
| baf6cf911eb4d01ae16f3451a6640883 | 8 | 0.999978894 | D_0__Bacteria;D_1__Bacteroidetes;D_2__Bacteroidia;D_3__Flavobacteriales;D_4__Flavobacteriaceae                                                     |
| 2ed48e3b0a583bc636767e0dc2609274 | 7 | 0.994292422 | D_0__Bacteria;D_1__Bacteroidetes;D_2__Bacteroidia;D_3__Flavobacteriales;D_4__Flavobacteriaceae;D_5__Ulvibacter;D_6__uncultured marine bacterium    |
| 7874f80382e597a6eb3bf95a6defd394 | 7 | 0.875967844 | D_0__Bacteria;D_1__Fusobacteria;D_2__Fusobacteriia;D_3__Fusobacteriales;D_4__Fusobacteriaceae;D_5__Psychrilyobacter;D_6__uncultured bacterium      |
| 8852ae6351d0132687162bacbf5c558e | 7 | 0.945950996 | D_0__Bacteria;D_1__Bacteroidetes;D_2__Bacteroidia;D_3__Flavobacteriales;D_4__Flavobacteriaceae;D_5__Arcticflavibacter;D_6__uncultured bacterium    |
| 9390711f3044e7aba9cb577a0aaaf34e | 7 | 0.999999983 | D_0__Bacteria;D_1__Bacteroidetes;D_2__Bacteroidia;D_3__Flavobacteriales;D_4__Flavobacteriaceae;D_5__Pseudofulvibacter                              |
| b0dd91d8d7c89d5dfcf4c312564821e8 | 7 | 0.999999919 | D_0__Bacteria;D_1__Proteobacteria;D_2__Gammaproteobacteria;D_3__Tenderiales;D_4__Tenderiaceae;D_5__Candidatus Tenderia                             |

|                                  |   |             |                                                                                                                                                                                  |
|----------------------------------|---|-------------|----------------------------------------------------------------------------------------------------------------------------------------------------------------------------------|
| d753a45b28b4542443dbfd12cba83a5b | 7 | 0.999854193 | D_0__Bacteria;D_1__Bacteroidetes;D_2__Bacteroidia;D_3__Chitinophagales;D_4__uncultured;D_5__uncultured Sphingobacteriales bacterium;D_6__uncultured Sphingobacteriales bacterium |
| d82a1758e5d6ed55452b2fa01dc32240 | 7 | 0.920591936 | D_0__Bacteria;D_1__Proteobacteria;D_2__Gammaproteobacteria;D_3__Thiotrichales;D_4__Thiotrichaceae;D_5__Leucothrix;Ambiguous_taxa                                                 |
| df3485238d28be83c8532a8a909c8f59 | 7 | 0.999991163 | D_0__Bacteria;D_1__Bacteroidetes;D_2__Bacteroidia;D_3__Cytophagales;D_4__Cyclobacteriaceae;D_5__Reichenbachiella;D_6__uncultured bacterium                                       |
| fae896f1fb945462f67f3a67a0d79954 | 7 | 0.877468478 | D_0__Bacteria;D_1__Bacteroidetes;D_2__Bacteroidia;D_3__Flavobacteriales;D_4__Flavobacteriaceae;D_5__uncultured                                                                   |
| fd556660b39a8d9d68f05271539b9ef6 | 7 | 0.91165048  | D_0__Bacteria;D_1__Proteobacteria;D_2__Gammaproteobacteria;D_3__Oceanospirillales;D_4__Oleiphilaceae;D_5__Oleiphilus;D_6__uncultured gamma proteobacterium                       |
| 0734ba045054b53eb03f53a7e74ce39d | 6 | 0.966462036 | D_0__Bacteria;D_1__Proteobacteria;D_2__Deltaproteobacteria;D_3__Myxococcales;D_4__Blfdi19;D_5__uncultured bacterium;D_6__uncultured bacterium                                    |
| 07694b01b7ea9e9a39899530f7541af9 | 6 | 0.97574035  | D_0__Bacteria;D_1__Bacteroidetes;D_2__Bacteroidia;D_3__Flavobacteriales;D_4__Flavobacteriaceae;D_5__Ulvibacter                                                                   |
| 0b04405baedf51a425f743c1d9e6905a | 6 | 0.760940266 | D_0__Bacteria;D_1__Proteobacteria;D_2__Alphaproteobacteria;D_3__Caulobacteriales;D_4__Hyphomonadaceae;D_5__uncultured;D_6__uncultured alpha proteobacterium                      |
| 114ff11a2b5085191d3af94b3db86ce7 | 6 | 0.991156807 | D_0__Bacteria;D_1__Proteobacteria;D_2__Alphaproteobacteria;D_3__Rhizobiales;D_4__Rhizobiaceae                                                                                    |
| 43701eb4ff6823885b53f82c7aa3b41e | 6 | 0.999965685 | D_0__Bacteria;D_1__Proteobacteria;D_2__Gammaproteobacteria;D_3__Oceanospirillales;D_4__Pseudohongiellaceae;D_5__Pseudohongiella                                                  |
| 440876b3d8ac4365b1f63f93be24f02d | 6 | 0.900456527 | D_0__Bacteria;D_1__Bacteroidetes;D_2__Bacteroidia;D_3__Flavobacteriales;D_4__Crocinitomicaceae;D_5__Crocinitomix;Ambiguous_taxa                                                  |
| 8249a563d2c03ee2f719dc5d24fb0c00 | 6 | 1           | D_0__Bacteria;D_1__Bacteroidetes;D_2__Bacteroidia;D_3__Flavobacteriales;D_4__Flavobacteriaceae                                                                                   |
| 83c82b926eb576ecbf92daf178a21267 | 6 | 0.819204897 | D_0__Bacteria;D_1__Proteobacteria;D_2__Gammaproteobacteria;D_3__Steroidobacteriales;D_4__Woeseiaceae;D_5__Woeseia                                                                |
| b69b0d3890492c3a332d9eb69a0b28b3 | 6 | 0.898447454 | D_0__Bacteria;D_1__Bacteroidetes;D_2__Bacteroidia;D_3__Flavobacteriales;D_4__Flavobacteriaceae;D_5__Pseudofulvibacter;Ambiguous_taxa                                             |
| badc7e0169c2aa5ef4e044cbb2b6c500 | 6 | 0.959497183 | D_0__Bacteria;D_1__Bacteroidetes;D_2__Bacteroidia;D_3__Flavobacteriales;D_4__Flavobacteriaceae;D_5__Lutimonas;Ambiguous_taxa                                                     |
| bd7f3a03456c7658ca48b649af8eeb56 | 6 | 0.988450034 | D_0__Bacteria;D_1__Proteobacteria;D_2__Gammaproteobacteria;D_3__OM182 clade;Ambiguous_taxa;Ambiguous_taxa;Ambiguous_taxa                                                         |

|                                  |   |             |                                                                                                                                                                                  |
|----------------------------------|---|-------------|----------------------------------------------------------------------------------------------------------------------------------------------------------------------------------|
| d58d9619c3feb93a407d1b654342c852 | 6 | 0.996470124 | D_0__Bacteria;D_1__Bacteroidetes;D_2__Bacteroidia;D_3__Flavobacteriales;D_4__Flavobacteriaceae;D_5__Kordia;Ambiguous_taxa                                                        |
| d5d849c8ae6cbf5fa1d626575c365468 | 6 | 0.897136029 | D_0__Bacteria;D_1__Proteobacteria;D_2__Gammaproteobacteria;D_3__Alteromonadales;D_4__Alteromonadaceae;D_5__Paraglaciecola;Ambiguous_taxa                                         |
| ea5e40c523be5744ce50bc9c24aae93c | 6 | 0.970685711 | D_0__Bacteria;D_1__Proteobacteria;D_2__Alphaproteobacteria                                                                                                                       |
| fe63eab2baa2a22eb52cb32d332511f6 | 6 | 0.994538372 | D_0__Bacteria;D_1__Verrucomicrobia;D_2__Verrucomicrobiae;D_3__Verrucomicrobiales;D_4__DEV007;D_5__uncultured Verrucomicrobia bacterium;D_6__uncultured Verrucomicrobia bacterium |
| fe6cb0afe45ab56fde5f6491e7a4853f | 6 | 0.999995781 | D_0__Bacteria;D_1__Proteobacteria;D_2__Gammaproteobacteria;D_3__Cellvibrionales;D_4__Halieaceae                                                                                  |
| 00a8468015f87dce01d98ed62581d8f9 | 5 | 0.928700511 | D_0__Bacteria;D_1__Bacteroidetes;D_2__Bacteroidia;D_3__Chitinophagales;D_4__uncultured;D_5__uncultured Bacteroidetes bacterium;D_6__uncultured Bacteroidetes bacterium           |
| 083a82373b22ec10045bdabce3b6c45a | 5 | 0.999999952 | D_0__Bacteria;D_1__Proteobacteria;D_2__Alphaproteobacteria;D_3__Rhodovibrionales;D_4__Kiloniaceae;D_5__Kiloniella                                                                |
| 1ea66ec48c7d65a3a472aa4245af1c90 | 5 | 0.850724554 | D_0__Bacteria;D_1__Bacteroidetes;D_2__Bacteroidia;D_3__Chitinophagales;D_4__Saprospiraceae;D_5__uncultured;D_6__uncultured Bacteroidetes bacterium                               |
| 24510bb1d95a4c4eafd3a1022b214d05 | 5 | 0.812095923 | D_0__Bacteria;D_1__Bacteroidetes;D_2__Bacteroidia;D_3__Flavobacteriales;D_4__Flavobacteriaceae;D_5__Polaribacter                                                                 |
| 249174fb86128c197098f81aba111996 | 5 | 0.95352615  | D_0__Bacteria;D_1__Proteobacteria;D_2__Gammaproteobacteria;D_3__Arenicellales;D_4__Arenicellaceae;D_5__Arenicella;D_6__uncultured gamma proteobacterium                          |
| 2aa7103bf5226d561f5315d393a0527d | 5 | 0.926619565 | D_0__Bacteria;D_1__Proteobacteria;D_2__Alphaproteobacteria;D_3__Micavibrionales;D_4__Micavibrionaceae;D_5__uncultured;D_6__uncultured bacterium                                  |
| 2bb4d67a7d8c3e4c647ed17fd072e74d | 5 | 0.867904373 | D_0__Bacteria;D_1__Verrucomicrobia;D_2__Verrucomicrobiae;D_3__Verrucomicrobiales;D_4__DEV007;D_5__uncultured deep-sea bacterium;D_6__uncultured deep-sea bacterium               |
| 46f1273e4585071df64ff30412ff30ff | 5 | 0.999999914 | D_0__Bacteria;D_1__Planctomycetes;D_2__OM190                                                                                                                                     |
| 4aa6874360158baeebfd783061e7ae02 | 5 | 0.748410862 | D_0__Bacteria;D_1__Proteobacteria;D_2__Gammaproteobacteria;D_3__Cellvibrionales;D_4__Spongiibacteraceae;D_5__BD1-7 clade                                                         |
| 6654b008689f523f8b471881dceb2a4c | 5 | 0.999999994 | D_0__Bacteria;D_1__Patescibacteria;D_2__Parcubacteria;D_3__Candidatus Campbellbacteria                                                                                           |
| 6cb1587876ef02be596da19701676dab | 5 | 0.946308243 | D_0__Bacteria;D_1__Proteobacteria;D_2__Gammaproteobacteria;D_3__Cellvibrionales;D_4__Halieaceae;D_5__OM60(NOR5) clade;D_6__uncultured bacterium                                  |

|                                  |   |             |                                                                                                                                                                               |
|----------------------------------|---|-------------|-------------------------------------------------------------------------------------------------------------------------------------------------------------------------------|
| 6dd2160e7d29115148c388d0ab6cf631 | 5 | 0.95469187  | D_0__Bacteria;D_1__Proteobacteria;D_2__Gammaproteobacteria;D_3__Cellvibrionales;D_4__Halieaceae;D_5__Halioglobus;D_6__Saccharina japonica                                     |
| 7086bdb7d00fa7ede3793bfaecdda290 | 5 | 0.952142225 | D_0__Bacteria;D_1__Bacteroidetes;D_2__Bacteroidia;D_3__Chitinophagales;D_4__Saprospiraceae;D_5__Lewinella;D_6__Lewinella agarilytica                                          |
| 71dac9bd043cd476f40ef2d5e7bb28fa | 5 | 0.999999551 | D_0__Bacteria;D_1__Proteobacteria;D_2__Gammaproteobacteria;D_3__Alteromonadales;D_4__Psychromonadaceae;D_5__Psychromonas                                                      |
| 7b4056c1dc66d0f4b83867fb71337b7b | 5 | 0.998931083 | D_0__Bacteria;D_1__Bacteroidetes;D_2__Bacteroidia;D_3__Bacteroidetes VC2.1 Bac22                                                                                              |
| 8d3f3ea41db5c368cb519d56ea863612 | 5 | 0.967409506 | D_0__Bacteria;D_1__Proteobacteria;D_2__Alphaproteobacteria;D_3__Rickettsiales;D_4__Rickettsiaceae;D_5__Candidatus Megaira;Ambiguous_taxa                                      |
| 8ffa9c2df90158e2e2cfa6c4ccaa0b52 | 5 | 0.99906136  | D_0__Bacteria;D_1__Proteobacteria;D_2__Gammaproteobacteria;D_3__KI89A clade;D_4__uncultured gamma proteobacterium;D_5__uncultured gamma proteobacterium;D_6__uncultured gamma |
| 908a80f39bd18379e9e6f2ab9948e477 | 5 | 0.764072575 | D_0__Bacteria;D_1__Bacteroidetes;D_2__Bacteroidia;D_3__Chitinophagales;D_4__Saprospiraceae;D_5__uncultured;D_6__uncultured Bacteroidetes bacterium                            |
| c1ea9b3d65046fc3117ed5ee17c4b8a1 | 5 | 0.990127023 | D_0__Bacteria;D_1__Bacteroidetes;D_2__Bacteroidia;D_3__Flavobacteriales;D_4__Cryomorphaceae;D_5__uncultured                                                                   |
| c50c14389abdb643c592052582edc4b4 | 5 | 0.782694916 | D_0__Bacteria;D_1__Proteobacteria;D_2__Gammaproteobacteria;D_3__Gammaproteobacteria Incertae Sedis;D_4__Unknown Family;D_5__Marinicella;Ambiguous_taxa                        |
| c84d321d0e04bd8202dd6e1ae1ac41b1 | 5 | 0.999998793 | D_0__Bacteria;D_1__Proteobacteria;D_2__Gammaproteobacteria;D_3__Arenicellales;D_4__Arenicellaceae;D_5__Arenicella                                                             |
| cd4bbda080d4aeb2afdfbb6d83cb5e8e | 5 | 0.997585394 | D_0__Bacteria;D_1__Bacteroidetes;D_2__Bacteroidia;D_3__Chitinophagales;D_4__Saprospiraceae;D_5__uncultured                                                                    |
| dc99114ad680ef9f30110cfb2baadd51 | 5 | 0.941420646 | D_0__Bacteria;D_1__Proteobacteria;D_2__Gammaproteobacteria;D_3__Cellvibrionales;D_4__Halieaceae;D_5__OM60(NOR5) clade                                                         |
| e9c00c498f88216d24379be57c5e2660 | 5 | 0.976968192 | D_0__Bacteria;D_1__Chloroflexi;D_2__Anaerolineae;D_3__Ardenticatenales;D_4__uncultured;Ambiguous_taxa;Ambiguous_taxa                                                          |
| f011094a245568cfea52fdb6a132cbf7 | 5 | 0.999938748 | D_0__Bacteria;D_1__Bacteroidetes;D_2__Bacteroidia;D_3__Chitinophagales;D_4__Saprospiraceae;D_5__uncultured;D_6__uncultured marine bacterium                                   |
| f48d534b86d383e50b59a2c3815b115e | 5 | 0.98347029  | D_0__Bacteria;D_1__Bacteroidetes;D_2__Bacteroidia;D_3__Chitinophagales;D_4__Saprospiraceae;D_5__uncultured;D_6__uncultured bacterium                                          |
| 085f909fd9aedf1a0bbd3798cf5279b  | 4 | 0.887600266 | D_0__Bacteria;D_1__Proteobacteria;D_2__Gammaproteobacteria;D_3__Thiomicrospirales;D_4__Thioglobaceae;D_5__SUP05 cluster;D_6__uncultured marine bacterium                      |

|                                  |   |             |                                                                                                                                                                         |
|----------------------------------|---|-------------|-------------------------------------------------------------------------------------------------------------------------------------------------------------------------|
| 16a17b6bff10137f8e1a022d6202656a | 4 | 0.955923338 | D_0__Bacteria;D_1__Bacteroidetes;D_2__Bacteroidia;D_3__Chitinophagales;D_4__Saprospiraceae;D_5__uncultured;D_6__uncultured bacterium                                    |
| 1842b42087ff314a68c6ec0b87da0753 | 4 | 0.936289163 | D_0__Bacteria;D_1__Proteobacteria;D_2__Deltaproteobacteria;D_3__PB19;D_4__uncultured bacterium;D_5__uncultured bacterium;D_6__uncultured bacterium                      |
| 3845f987090ff4dc36b9cf58bb441e31 | 4 | 1           | D_0__Bacteria;D_1__Bacteroidetes;D_2__Bacteroidia;D_3__Cytophagales;D_4__Bernardetiaceae;D_5__Bernardetia;Ambiguous_taxa                                                |
| 43573e6b5c36be0d5af77c5e699de989 | 4 | 0.97948175  | D_0__Bacteria;D_1__Bacteroidetes;D_2__Bacteroidia;D_3__Chitinophagales;D_4__Saprospiraceae;D_5__uncultured                                                              |
| 517ee1f407ca6aeaf0f3d5bca3149fe7 | 4 | 0.981330229 | D_0__Bacteria;D_1__Bacteroidetes;D_2__Bacteroidia;D_3__Flavobacteriales;D_4__Flavobacteriaceae;D_5__uncultured;D_6__uncultured Lutibacter sp.                           |
| 56370f6c6a447928066d992816943e95 | 4 | 0.999885255 | D_0__Bacteria;D_1__Bacteroidetes;D_2__Bacteroidia;D_3__Chitinophagales;D_4__Saprospiraceae;D_5__uncultured                                                              |
| 5a5ac0fe46feb8370df8de977a20e5a7 | 4 | 0.999724897 | D_0__Bacteria;D_1__Verrucomicrobia;D_2__Verrucomicrobiae;D_3__Opitutales;D_4__Puniceicoccaceae;D_5__Lentimonas                                                          |
| 5ef16d5bc24d4bbf574ea171480b7344 | 4 | 0.790756239 | D_0__Bacteria;D_1__Proteobacteria;D_2__Gammaproteobacteria;D_3__JTB23;D_4__uncultured bacterium;D_5__uncultured bacterium;D_6__uncultured bacterium                     |
| 67b6fbaae40c0e6217ddd8ac577003ee | 4 | 0.998606237 | D_0__Bacteria;D_1__Actinobacteria;D_2__Acidimicrobia;D_3__Microtrichales;D_4__Microtrichaceae;D_5__uncultured;Ambiguous_taxa                                            |
| 6ce459bb36d31e51ac2df23dfab7a5d5 | 4 | 0.955947538 | D_0__Bacteria;D_1__Lentisphaerae;D_2__Lentisphaeria;D_3__Lentisphaerales;D_4__Lentisphaeraceae;D_5__Lentisphaera;D_6__uncultured organism                               |
| a9d2b445506e18c66020cf2399e3f98b | 4 | 0.999997816 | D_0__Bacteria;D_1__Proteobacteria;D_2__Gammaproteobacteria;D_3__Arenicellales;D_4__Arenicellaceae;D_5__HTCC5015;D_6__uncultured gamma proteobacterium                   |
| aa2b3a79f63097e06fb754a2d0cebbbc | 4 | 0.780580098 | D_0__Bacteria;D_1__Bacteroidetes;D_2__Bacteroidia;D_3__Chitinophagales;D_4__Saprospiraceae;D_5__Portibacter;D_6__uncultured bacterium                                   |
| c49a43716ce4ca4d4029913af299067c | 4 | 0.844460712 | D_0__Bacteria;D_1__Proteobacteria;D_2__Gammaproteobacteria;D_3__Cellvibrionales;D_4__Spongiibacteraceae;D_5__BD1-7 clade                                                |
| ce9458307297e216dd1e5e49a2a88c2a | 4 | 0.999981121 | D_0__Bacteria;D_1__Bacteroidetes;D_2__Bacteroidia;D_3__Cytophagales;D_4__Cyclobacteriaceae;D_5__uncultured;D_6__uncultured sediment bacterium                           |
| d423fb662fac55cc101e7eb3870b4a32 | 4 | 0.954661009 | D_0__Bacteria;D_1__Proteobacteria;D_2__Gammaproteobacteria;D_3__Gammaproteobacteria Incertae Sedis;D_4__Unknown Family;D_5__Marinicella;D_6__uncultured Marinicella sp. |
| dc0ad7ea4f45a7c3f59c2b59d71587a8 | 4 | 0.992598105 | D_0__Bacteria;D_1__Proteobacteria;D_2__Gammaproteobacteria;D_3__Oceanospirillales;D_4__Kangielaceae;D_5__Aliikangiella;D_6__uncultured bacterium                        |

|                                  |   |             |                                                                                                                                                                         |
|----------------------------------|---|-------------|-------------------------------------------------------------------------------------------------------------------------------------------------------------------------|
| e23e179b1541672770ccfb43f8a1b9ce | 4 | 0.948864033 | D_0__Bacteria;D_1__Proteobacteria;D_2__Gammaproteobacteria;D_3__SZB50;D_4__uncultured gamma proteobacterium;D_5__uncultured gamma proteobacterium;D_6__uncultured gamma |
| ee5f06479b01c2f75b9e517ee7d66cf6 | 4 | 0.907797936 | D_0__Bacteria;D_1__Bacteroidetes;D_2__Bacteroidia;D_3__Chitinophagales;D_4__Saprospiraceae;D_5__uncultured                                                              |
| 074ad65a206ef6f821f59172e56026b8 | 3 | 0.997183526 | D_0__Bacteria;D_1__Bacteroidetes;D_2__Bacteroidia;D_3__Chitinophagales;D_4__uncultured;D_5__uncultured Bacteroidetes bacterium;D_6__uncultured Bacteroidetes bacterium  |
| 09a3b1e276a31f3f9e9a2f524c4061ee | 3 | 0.969171517 | D_0__Bacteria;D_1__Bacteroidetes;D_2__Bacteroidia;D_3__Cytophagales;D_4__Amoebophilaceae;D_5__uncultured;D_6__uncultured bacterium                                      |
| 0a9245d394e32d7b5d84e593095b2546 | 3 | 0.982636334 | D_0__Bacteria;D_1__Proteobacteria;D_2__Deltaproteobacteria;D_3__Myxococcales;D_4__Haliangiaceae;D_5__Haliangium;D_6__uncultured deep-sea bacterium                      |
| 0c21eda91308d643a8f95e9588f2a6c6 | 3 | 0.926942772 | D_0__Bacteria;D_1__Verrucomicrobia;D_2__Verrucomicrobiae;D_3__Verrucomicrobiales;D_4__Rubritaleaceae;D_5__Roseibacillus;D_6__uncultured marine bacterium                |
| 2e0ceaf33e571630ceabe35a0477615f | 3 | 0.93838107  | D_0__Bacteria;D_1__Proteobacteria;D_2__Gammaproteobacteria;D_3__Cellvibrionales;D_4__Halieaceae;D_5__Halioglobus                                                        |
| 58b68861741a447896f6d30cad27d9d3 | 3 | 0.998106023 | D_0__Bacteria;D_1__Bacteroidetes;D_2__Bacteroidia;D_3__Flavobacteriales;D_4__Crocinitomicaceae;D_5__uncultured                                                          |
| 5a1f8148ba7c19ba89e32c426b660cd6 | 3 | 0.999991849 | D_0__Bacteria;D_1__Bacteroidetes;D_2__Bacteroidia;D_3__Flavobacteriales;D_4__Flavobacteriaceae                                                                          |
| 6a6692d92947022df272e24c9a144103 | 3 | 0.999999054 | D_0__Bacteria;D_1__Proteobacteria;D_2__Deltaproteobacteria;D_3__Myxococcales;D_4__Sandaracina ceae;D_5__uncultured                                                      |
| 6bbf35251ac5a1cfc73af04e85db50cb | 3 | 0.999712485 | D_0__Bacteria;D_1__Proteobacteria;D_2__Gammaproteobacteria;D_3__Cellvibrionales;D_4__Halieaceae                                                                         |
| 941c1066287d07859a05174f31a3e849 | 3 | 1           | D_0__Bacteria;D_1__Bacteroidetes;D_2__Bacteroidia;D_3__Flavobacteriales;D_4__Flavobacteriaceae                                                                          |
| 9b5dd8d46eba3fc4707705d66920f305 | 3 | 0.999934201 | D_0__Bacteria;D_1__Proteobacteria;D_2__Deltaproteobacteria;D_3__Myxococcales;D_4__bacteriap25;D_5__uncultured organism;D_6__uncultured organism                         |
| a24267bca26fc178bbca1e25214bdb57 | 3 | 0.926133483 | D_0__Bacteria;D_1__Proteobacteria;D_2__Deltaproteobacteria;D_3__Bdellovibrionales;D_4__Bacteriovoraceae;D_5__uncultured                                                 |
| a31910efc6ad722aa8c523b23ca17804 | 3 | 0.99999998  | D_0__Bacteria;D_1__Epsilonbacteraeota;D_2__Campylobacteria;D_3__Campylobacteriales;D_4__Arcobacteraceae;D_5__Arcobacter                                                 |
| a4d5dc6c404d37f861cb0afc8e95ef47 | 3 | 0.978829634 | D_0__Bacteria;D_1__Bacteroidetes;D_2__Bacteroidia;D_3__Flavobacteriales;D_4__Crocinitomicaceae;D_5__Crocinitomix;D_6__Crocinitomix sp. 0182                             |

|                                  |   |             |                                                                                                                                                                               |
|----------------------------------|---|-------------|-------------------------------------------------------------------------------------------------------------------------------------------------------------------------------|
| a611520840b0df74f3f4bbfa3f24871c | 3 | 0.999998031 | D_0__Bacteria;D_1__Proteobacteria;D_2__Alphaproteobacteria;D_3__Caulobacterales;D_4__Hyphomnadaceae;D_5__Hellea                                                               |
| a710bbf3598674a0c4d4cf608c945d39 | 3 | 0.908165943 | D_0__Bacteria;D_1__Proteobacteria;D_2__Gammaproteobacteria;D_3__Cellvibrionales;D_4__Haliaceae;D_5__Halioglobus                                                               |
| ac37cb56a2f60c859c6128a387dd001e | 3 | 0.987476292 | D_0__Bacteria;D_1__Proteobacteria;D_2__Deltaproteobacteria;D_3__Myxococcales;D_4__Eel-36e1D6                                                                                  |
| b2c9bc9bdda9971f1a930b5232f6efe4 | 3 | 0.870096016 | D_0__Bacteria;D_1__Bacteroidetes;D_2__Bacteroidia;D_3__Cytophagales;D_4__Cyclobacteriaceae;D_5__uncultured;Ambiguous_taxa                                                     |
| b6620e454c0522825a483adb3345b757 | 3 | 0.747383685 | D_0__Bacteria;D_1__Bacteroidetes;D_2__Bacteroidia;D_3__Flavobacteriales;D_4__Cryomorphaceae;D_5__uncultured;D_6__uncultured Bacteroidetes bacterium                           |
| ca3153e68e47da6ec5023c2a5d78bf08 | 3 | 0.994399661 | D_0__Bacteria;D_1__Proteobacteria;D_2__Deltaproteobacteria;D_3__NB1-j;Ambiguous_taxa;Ambiguous_taxa;Ambiguous_taxa                                                            |
| e28011584ccaced1fa94c55ac529a128 | 3 | 0.99205407  | D_0__Bacteria;D_1__Bacteroidetes;D_2__Bacteroidia;D_3__Flavobacteriales;D_4__Flavobacteriaceae;D_5__Ulviacter;D_6__uncultured bacterium                                       |
| f40c07cafcd0f9a8e2e848462ebbc32  | 3 | 0.880890278 | D_0__Bacteria;D_1__Proteobacteria;D_2__Gammaproteobacteria;D_3__Cellvibrionales;D_4__Haliaceae;D_5__Halioglobus;D_6__Saccharina japonica                                      |
| fbded9582f1e981500cbcd900bf9385e | 3 | 0.972015858 | D_0__Bacteria;D_1__Chloroflexi;D_2__Anaerolineae;D_3__Ardenticatenales;D_4__uncultured;D_5__uncultured bacterium;D_6__uncultured bacterium                                    |
| 22be5673e01d15edae6f2de3cb8a863  | 2 | 1           | D_0__Bacteria;D_1__Proteobacteria;D_2__Deltaproteobacteria;D_3__Myxococcales;D_4__Nannocystaceae                                                                              |
| 3b9747f15c0ed6fcfbc2af0a44eb442  | 2 | 0.997271682 | D_0__Bacteria;D_1__Patescibacteria;D_2__Gracilibacteria;D_3__JGI 0000069-P22;D_4__uncultured bacterium;D_5__uncultured bacterium;D_6__uncultured bacterium                    |
| 4477483870925dfa3787975cb7eec08d | 2 | 0.999982821 | D_0__Bacteria;D_1__WPS-2;D_2__uncultured bacterium;D_3__uncultured bacterium;D_4__uncultured bacterium;D_5__uncultured bacterium;D_6__uncultured bacterium                    |
| 44ce77063de0e615def7f4be6e01e343 | 2 | 0.999892149 | D_0__Bacteria;D_1__Patescibacteria;D_2__Parcubacteria;D_3__Candidatus Moranbacteria;D_4__uncultured bacterium;D_5__uncultured bacterium;D_6__uncultured bacterium             |
| 4da426668e8d9202c8111628a29bbaf0 | 2 | 0.764358193 | D_0__Bacteria;D_1__Proteobacteria;D_2__Gammaproteobacteria;D_3__Cellvibrionales;D_4__Haliaceae;D_5__OM60(NOR5) clade                                                          |
| 7a7340214845e07ec920c4dedae937f9 | 2 | 0.967069786 | D_0__Bacteria;D_1__Proteobacteria;D_2__Deltaproteobacteria;D_3__PB19;D_4__uncultured deep-sea bacterium;D_5__uncultured deep-sea bacterium;D_6__uncultured deep-sea bacterium |
| 7b17bc11e0abe0e899d2f8c0e1db5e4b | 2 | 0.996876944 | D_0__Bacteria;D_1__Proteobacteria;D_2__Gammaproteobacteria;D_3__UBA10353 marine group                                                                                         |

|                                  |   |             |                                                                                                                                                              |
|----------------------------------|---|-------------|--------------------------------------------------------------------------------------------------------------------------------------------------------------|
| 7c2f78382155f501228a4731b2b438d3 | 2 | 0.954139161 | D_0__Bacteria;D_1__Bacteroidetes;D_2__Bacteroidia;D_3__Flavobacteriales;D_4__Schleiferiaceae;D_5__Schleiferia;Ambiguous_taxa                                 |
| 87eafc99da738900dd2b657c8fd74fcb | 2 | 0.999999917 | D_0__Bacteria;D_1__Proteobacteria;D_2__Gammaproteobacteria                                                                                                   |
| 880f3181259f4029660b3b21d501dbc3 | 2 | 0.999999266 | D_0__Bacteria;D_1__Bacteroidetes;D_2__Bacteroidia;D_3__Cytophagales;D_4__Amoebophilaceae;D_5__uncultured                                                     |
| 9675509ad27b39a83dfd976fce0560d9 | 2 | 0.760972754 | D_0__Bacteria;D_1__Proteobacteria;D_2__Gammaproteobacteria;D_3__Alteromonadales;D_4__Colwelliaceae;D_5__Colwellia                                            |
| 9c68652c784c1a82bf0485a5e8738442 | 2 | 0.999896557 | D_0__Bacteria;D_1__Proteobacteria;D_2__Alphaproteobacteria;D_3__Micavibrionales;D_4__Micavibrionaceae;D_5__uncultured                                        |
| 9c6878ab573f961608ddc1c858109612 | 2 | 0.997362908 | D_0__Bacteria;D_1__Proteobacteria;D_2__Alphaproteobacteria;D_3__Rhizobiales;D_4__Rhizobiales Incertae Sedis;D_5__Andersenella;Ambiguous_taxa                 |
| a7a7c6fa482957f1e6ddb23fc660d5f3 | 2 | 0.999999113 | D_0__Bacteria;D_1__Proteobacteria;D_2__Deltaproteobacteria;D_3__Bdellovibrionales;D_4__Bdellovibrionaceae;D_5__OM27 clade                                    |
| aa1c1a111e0916528fda6ff7c22f7114 | 2 | 0.991078304 | D_0__Bacteria;D_1__Proteobacteria;D_2__Deltaproteobacteria;D_3__Desulfobacteriales;D_4__Desulfobacteraceae;D_5__Desulfosarcina;Ambiguous_taxa                |
| ae8eee9443d863f4aa9ac72bcacfc227 | 2 | 0.800858152 | D_0__Bacteria;D_1__Proteobacteria;D_2__Deltaproteobacteria;D_3__Bdellovibrionales;D_4__Bdellovibrionaceae;D_5__Bdellovibrio;D_6__uncultured Bdellovibrio sp. |
| e63851ec4add7c00cf1c58139653ec21 | 2 | 0.999822933 | D_0__Bacteria;D_1__Proteobacteria;D_2__Gammaproteobacteria;D_3__Oceanospirillales;D_4__Endozoicomonadaceae;D_5__Endozoicomonas                               |
| f90a8e630b8cfdff29b353813409ab8  | 2 | 0.795486921 | D_0__Bacteria;D_1__Bacteroidetes;D_2__Bacteroidia;D_3__Flavobacteriales;D_4__Flavobacteriaceae;D_5__Aquibacter                                               |
| 2f5bd330cf65bda9028181c7feef7a23 | 1 | 0.999998871 | D_0__Bacteria;D_1__Proteobacteria;D_2__Gammaproteobacteria                                                                                                   |
| 35867c74d4e209233847681dda7de645 | 1 | 0.999999974 | D_0__Bacteria;D_1__Proteobacteria;D_2__Gammaproteobacteria                                                                                                   |
| 4591377c6d349960df79cbe9b7ab95fd | 1 | 0.958580077 | D_0__Bacteria;D_1__Proteobacteria;D_2__Gammaproteobacteria;D_3__Oceanospirillales;D_4__Nitriolaceae;D_5__uncultured                                          |
| 47307b8283c3614e9c0f7b9b3cf52d58 | 1 | 1           | D_0__Bacteria                                                                                                                                                |
| 5aa19433dc70e7af8aebc0a78b63bd23 | 1 | 0.999999969 | D_0__Bacteria;D_1__Proteobacteria;D_2__Gammaproteobacteria                                                                                                   |



|                                  |   |             |                                                                                                                                                                  |
|----------------------------------|---|-------------|------------------------------------------------------------------------------------------------------------------------------------------------------------------|
| 5bcd674deba252800b4c2be7701df8b6 | 1 | 0.999999929 | D_0__Bacteria;D_1__Proteobacteria;D_2__Gammaproteobacteria                                                                                                       |
| 6286607563def4d7f3f316c248a7ac6f | 1 | 0.999999935 | D_0__Bacteria;D_1__Proteobacteria;D_2__Gammaproteobacteria                                                                                                       |
| 687ba53d93ea3e07b6981e10390fc78b | 1 | 0.999990119 | D_0__Bacteria;D_1__Bacteroidetes;D_2__Bacteroidia;D_3__Flavobacteriales;D_4__Flavobacteriaceae                                                                   |
| 747cdd0a60ca9e9549af2ddd311a6c64 | 1 | 0.826414913 | D_0__Bacteria;D_1__Proteobacteria;D_2__Gammaproteobacteria;D_3__Oceanospirillales;D_4__Nitri-<br>nolaceae;D_5__uncultured;D_6__uncultured marine bacterium       |
| a818fc81c896c24ffe175bc98a6ae8dd | 1 | 0.996232638 | D_0__Bacteria;D_1__Proteobacteria;D_2__Gammaproteobacteria;D_3__Ectothiorhodospirales;D_4__E-<br>ctothiorhodospiraceae;D_5__uncultured;D_6__uncultured bacterium |
| ad00a990773ccc085390a8d9b1cd2f41 | 1 | 0.881892521 | D_0__Bacteria;D_1__Proteobacteria;D_2__Gammaproteobacteria;D_3__Alteromonadales;D_4__Altero-<br>monadaceae                                                       |
| af9d479f4b6256d0f59da90f64eea627 | 1 | 0.993884199 | D_0__Bacteria;D_1__Proteobacteria;D_2__Gammaproteobacteria;D_3__HOC36;D_4__uncultured<br>bacterium;D_5__uncultured bacterium;D_6__uncultured bacterium           |
| c84414b510ae2af8c21836a2894103f7 | 1 | 0.949076794 | D_0__Bacteria;D_1__Proteobacteria;D_2__Gammaproteobacteria;D_3__Cellvibrionales;D_4__Spongiib-<br>acteraceae;D_5__BD1-7 clade;D_6__uncultured marine bacterium   |
| cf60aa59052b108edf6c929c9b44b86c | 1 | 0.999999926 | D_0__Bacteria;D_1__Proteobacteria;D_2__Gammaproteobacteria                                                                                                       |
| d417db562ab35fc0d490d7a8a4bf79cc | 1 | 0.835030433 | D_0__Bacteria;D_1__Proteobacteria;D_2__Gammaproteobacteria;D_3__Betaproteobacteriales;D_4__N-<br>itrosomonadaceae                                                |
| ddb65b3fec98525b373f8b9a77fbdeb5 | 1 | 0.965812289 | D_0__Bacteria;D_1__Proteobacteria;D_2__Gammaproteobacteria;D_3__Cellvibrionales;D_4__Spongiib-<br>acteraceae;D_5__BD1-7 clade;D_6__uncultured marine bacterium   |
| febe025e22663643e5493464c040c114 | 1 | 0.836770999 | D_0__Bacteria;D_1__Proteobacteria;D_2__Gammaproteobacteria;D_3__Oceanospirillales;D_4__Nitri-<br>nolaceae;D_5__uncultured;Ambiguous_taxa                         |

**Table S6.** ASVs found from *H. (Rhizoniera) dancoi* with percentage of confidence  $\geq 75\%$ .

| Feature ID                       | Number of sequences | Confidence  | Taxon                                                                                                                                                                       |
|----------------------------------|---------------------|-------------|-----------------------------------------------------------------------------------------------------------------------------------------------------------------------------|
| 8101484a5c241eb9197f3f5ed275e28d | 3374                | 0.999999995 | D_0__Bacteria;D_1__Proteobacteria;D_2__Alphaproteobacteria;D_3__Rhodobacterales;D_4__Rhodobacteraceae                                                                       |
| bd490e3ab22353eb9055a0cd610e6b7b | 1627                | 0.999979753 | D_0__Bacteria;D_1__Proteobacteria;D_2__Gammaproteobacteria;D_3__UBA10353 marine group                                                                                       |
| 66144bd48db1b642593c979327676e71 | 469                 | 0.803096292 | D_0__Bacteria;D_1__Nitrospinae;D_2__Nitrospina;D_3__Nitrospinales;D_4__Nitrospinaceae;D_5__LS-NOB;D_6__uncultured delta proteobacterium                                     |
| 8d47cc06557e4eef496df29414b3dae0 | 406                 | 0.964964319 | D_0__Bacteria;D_1__Proteobacteria;D_2__Gammaproteobacteria;D_3__JTB23;D_4__hydrothermal vent metagenome;D_5__hydrothermal vent metagenome;D_6__hydrothermal vent metagenome |
| 236cac611fc74c2387f52bce68880c0e | 386                 | 0.990036375 | D_0__Bacteria;D_1__Proteobacteria;D_2__Gammaproteobacteria;D_3__Betaproteobacteriales;D_4__Methylophilaceae;D_5__Methylotenera                                              |
| 818d9fce920f3637dd4f68382634c0e  | 284                 | 0.99941094  | D_0__Bacteria;D_1__Actinobacteria;D_2__Acidimicrobiia;D_3__Microtrichales;D_4__Microtrichaceae;D_5__Sva0996 marine group;D_6__uncultured organism                           |
| 2ababd6d22c8aad22fa045bbcaa423bc | 282                 | 0.907056143 | D_0__Bacteria;D_1__Proteobacteria;D_2__Alphaproteobacteria;D_3__Thalassobaculales;D_4__Nisaeaceae;D_5__OM75 clade;D_6__uncultured alpha proteobacterium                     |
| 178de13f8345fa4ee0d6a84777ccb705 | 247                 | 0.990355421 | D_0__Bacteria;D_1__Proteobacteria;D_2__Gammaproteobacteria;D_3__Thiomicrospirales;D_4__Thioglobaceae;D_5__SUP05 cluster;D_6__uncultured bacterium                           |
| 3d1a14e152a9397daebe6259de1c85b9 | 199                 | 0.999696372 | D_0__Bacteria;D_1__Actinobacteria;D_2__Acidimicrobiia;D_3__Microtrichales;D_4__Microtrichaceae;D_5__Sva0996 marine group;D_6__uncultured bacterium                          |
| 965a7a8086d78a368dd6bccc35429e79 | 133                 | 0.930569131 | D_0__Bacteria;D_1__Proteobacteria;D_2__Alphaproteobacteria;D_3__uncultured                                                                                                  |
| 148e426c8329a83fc5e43afaacdcc2c2 | 121                 | 0.999999226 | D_0__Bacteria;D_1__Proteobacteria;D_2__Gammaproteobacteria;D_3__Oceanospirillales;D_4__Pseudohongiellaceae;D_5__Pseudohongiella                                             |
| 063a62980037e31b544a1f92e34a032b | 94                  | 0.98905359  | D_0__Bacteria;D_1__Proteobacteria;D_2__Gammaproteobacteria;D_3__Betaproteobacteriales;D_4__Methylophilaceae;D_5__Methylotenera                                              |
| 9e7cd2e390b97196123849b615bc466c | 80                  | 0.998380182 | D_0__Bacteria                                                                                                                                                               |
| 91eb9562fc7aefa38568e96822db8f4b | 78                  | 0.941782157 | D_0__Bacteria;D_1__Proteobacteria;D_2__Alphaproteobacteria;D_3__Rhodospirillales;D_4__Magnetospiraceae;D_5__uncultured;D_6__uncultured bacterium                            |

|                                  |    |             |                                                                                                                                                          |
|----------------------------------|----|-------------|----------------------------------------------------------------------------------------------------------------------------------------------------------|
| 109f4a96b21eb6c1f3349132c4ffe186 | 66 | 0.755923215 | D_0__Bacteria;D_1__Proteobacteria;D_2__Gammaproteobacteria;D_3__Cellvibrionales;D_4__Spongiibacteraceae;D_5__BD1-7 clade;Ambiguous_taxa                  |
| 86c4313b7a3946068e32ca211314c4a6 | 58 | 0.979720802 | D_0__Bacteria;D_1__Proteobacteria;D_2__Gammaproteobacteria;D_3__Cellvibrionales;D_4__Spongiibacteraceae;D_5__BD1-7 clade                                 |
| d3bc04a05bcab8a9d527fe3c946dfdee | 53 | 0.842346275 | D_0__Bacteria;D_1__Bacteroidetes;D_2__Bacteroidia;D_3__Cytophagales;D_4__Cyclobacteriaceae;D_5__Ekhidna;Ambiguous_taxa                                   |
| dcef5e9d4283900ba2cd2b66ab14894b | 53 | 0.957789518 | D_0__Bacteria;D_1__Proteobacteria;D_2__Alphaproteobacteria;D_3__uncultured;D_4__uncultured bacterium;D_5__uncultured bacterium;D_6__uncultured bacterium |
| 5d9835c028d02be320fdd0c95eb23f4f | 36 | 0.82943598  | D_0__Bacteria;D_1__Bacteroidetes;D_2__Bacteroidia;D_3__Flavobacteriales;D_4__Flavobacteriaceae;D_5__Polaribacter 1;Ambiguous_taxa                        |
| 2fe8d6838909663a039294cf48ea3720 | 21 | 1           | D_0__Bacteria;D_1__Firmicutes;D_2__Clostridia;D_3__Clostridiales;D_4__Peptostreptococcaceae;D_5__Peptostreptococcus                                      |
| ee0f5caff94365896ef095e26d1fed6d | 21 | 0.749932806 | D_0__Bacteria;D_1__Proteobacteria;D_2__Alphaproteobacteria;D_3__SAR11 clade;D_4__Clade I;D_5__Clade Ia                                                   |
| 2ecd7cdde1ebb615fe5b7d0bf14ff1d3 | 16 | 0.982377708 | D_0__Bacteria;D_1__Proteobacteria;D_2__Deltaproteobacteria;D_3__Bdellovibrionales;D_4__Bdellovibrionaceae;D_5__Bdellovibrio;D_6__uncultured bacterium    |
| 56ef94fb3e414b8ddcfbb92d223464b7 | 14 | 0.999748562 | D_0__Bacteria;D_1__Proteobacteria;D_2__Alphaproteobacteria;D_3__Rhodobacterales;D_4__Rhodobacteraceae                                                    |
| 5171c7c84b18d54ac99984e3fc0bc2f6 | 13 | 0.8955098   | D_0__Bacteria;D_1__Fusobacteria;D_2__Fusobacteriia;D_3__Fusobacteriales;D_4__Fusobacteriaceae;D_5__Fusobacterium;Ambiguous_taxa                          |
| ccb67f3a797ef786dc0c42cf3b8bd220 | 13 | 0.999963971 | D_0__Bacteria;D_1__Proteobacteria;D_2__Gammaproteobacteria;D_3__Alteromonadales;D_4__Colwelliaceae;D_5__Colwellia                                        |
| ce42b14845e10ad958ca1cb53045dbca | 12 | 0.995966837 | D_0__Bacteria;D_1__Proteobacteria;D_2__Gammaproteobacteria;D_3__Alteromonadales;D_4__Colwelliaceae;D_5__Colwellia                                        |
| da945cd94d83cad51bfcd0c5d26176a9 | 12 | 0.994989502 | D_0__Bacteria;D_1__Proteobacteria;D_2__Gammaproteobacteria;D_3__Arenicellales;D_4__Arenicellaceae;D_5__Arenicella;D_6__uncultured bacterium              |
| ece89bff980b08b04d6f8dbe287592c3 | 11 | 0.999999069 | D_0__Bacteria;D_1__Epsilonbacteraeota;D_2__Campylobacteria;D_3__Campylobacteriales;D_4__Arcobacteraceae;D_5__Arcobacter                                  |
| cfb8795bebf1b9c511f8939312c10d75 | 8  | 0.99808824  | D_0__Bacteria;D_1__Planctomycetes;D_2__Phycisphaerae;D_3__Phycisphaerales;D_4__Phycisphaeraeae;D_5__Phycisphaera                                         |
| 67f51937ae1fb923adccee019281e23a | 7  | 0.967116949 | D_0__Bacteria;D_1__Bacteroidetes;D_2__Bacteroidia;D_3__Bacteroidales;D_4__Bacteroidaceae;D_5__Bacteroides;D_6__uncultured bacterium                      |

|                                  |   |             |                                                                                                                                                              |
|----------------------------------|---|-------------|--------------------------------------------------------------------------------------------------------------------------------------------------------------|
| eb95a4e7fc05db5f925d4c8ca8ff01b8 | 7 | 1           | D_0__Bacteria;D_1__Bacteroidetes;D_2__Bacteroidia;D_3__Bacteroidales;D_4__Prevotellaceae;D_5__Alloprevotella                                                 |
| 061ebd61b6e228fb835fa95b48c4fef5 | 6 | 0.781049076 | D_0__Bacteria;D_1__Proteobacteria;D_2__Gammaproteobacteria;D_3__Arenicellales;D_4__Arenicellaceae;D_5__uncultured;Ambiguous_taxa                             |
| 6abb852c91aab4f588254187c4d86f7b | 6 | 0.784569604 | D_0__Bacteria;D_1__Proteobacteria;D_2__Gammaproteobacteria;D_3__UBA10353 marine group                                                                        |
| 7874f80382e597a6eb3bf95a6defd394 | 5 | 0.875967844 | D_0__Bacteria;D_1__Fusobacteria;D_2__Fusobacteriia;D_3__Fusobacteriales;D_4__Fusobacteriaceae;D_5__Psychrilyobacter;D_6__uncultured bacterium                |
| b45ad382acdfdda9b261dd9f408b9a41 | 5 | 0.891074376 | D_0__Bacteria;D_1__Fusobacteria;D_2__Fusobacteriia;D_3__Fusobacteriales;D_4__Fusobacteriaceae;D_5__Cetobacterium;D_6__uncultured bacterium                   |
| e1b000731bf1b4ab30332e90d5da12fd | 5 | 0.984201195 | D_0__Bacteria;D_1__Bacteroidetes;D_2__Bacteroidia;D_3__Bacteroidales;D_4__Rikenellaceae;D_5__Allostipes;D_6__uncultured bacterium                            |
| 04e1d5fe2db1e05d3f7464d881e335db | 4 | 0.999999631 | D_0__Bacteria;D_1__Epsilonbacteraeota;D_2__Campylobacteria;D_3__Campylobacteriales;D_4__Arcobacteraceae;D_5__Arcobacter                                      |
| 0aebc7c8b90e3922ae2960d6bc6ba3f8 | 4 | 0.968351558 | D_0__Bacteria;D_1__Proteobacteria;D_2__Gammaproteobacteria;D_3__Alteromonadales;D_4__Moritellaceae;D_5__Moritella;Ambiguous_taxa                             |
| 775cf63863803484cc269b57f8480f06 | 4 | 0.793784399 | D_0__Bacteria;D_1__Proteobacteria;D_2__Gammaproteobacteria;D_3__Tenderiales;D_4__Tenderiaceae;D_5__Candidatus Tenderia;D_6__uncultured gamma proteobacterium |
| d8661c97e95673d5ce39a8660bd77e1f | 4 | 0.969751856 | D_0__Bacteria                                                                                                                                                |
| f8138d2dc2b8ea0acdb8fa121bb28fa3 | 4 | 0.977022449 | D_0__Bacteria;D_1__Firmicutes;D_2__Clostridia;D_3__Clostridiales;D_4__Clostridiaceae 1;D_5__Clostridium sensu stricto 1                                      |
| 177920551a2a705a66e2f4a2663d4561 | 3 | 0.927689543 | D_0__Bacteria;D_1__Bacteroidetes;D_2__Bacteroidia;D_3__Flavobacteriales;D_4__Cryomorphaceae;D_5__uncultured;D_6__marine metagenome                           |
| 1db50f814d8a99be5666486f4a4de024 | 3 | 0.999094451 | D_0__Bacteria;D_1__Bacteroidetes;D_2__Bacteroidia;D_3__Flavobacteriales;D_4__Flavobacteriaceae;D_5__NS2b marine group                                        |
| 588712d3aea224fb95ee4119a7100b98 | 3 | 0.999931918 | D_0__Bacteria;D_1__Bacteroidetes;D_2__Bacteroidia;D_3__Flavobacteriales;D_4__NS9 marine group;D_5__seawater metagenome;D_6__seawater metagenome              |
| 67c9e284c7de43eb5596d0b6434a57f8 | 3 | 0.759345136 | D_0__Bacteria;D_1__Bacteroidetes;D_2__Bacteroidia;D_3__Bacteroidales;D_4__Prevotellaceae;D_5__Alloprevotella;D_6__gut metagenome                             |
| 8a4c5faa1ab7f0561f9124015ffebe4d | 3 | 0.981544224 | D_0__Bacteria;D_1__Proteobacteria;D_2__Gammaproteobacteria;D_3__Oceanospirillales;D_4__Nitricolaceae;D_5__uncultured;D_6__uncultured marine bacterium        |

|                                  |   |             |                                                                                                                                                                      |
|----------------------------------|---|-------------|----------------------------------------------------------------------------------------------------------------------------------------------------------------------|
| bca6f8c038dcda27a706e3ae8f739a85 | 3 | 0.99999991  | D_0__Bacteria;D_1__Patescibacteria;D_2__Parcubacteria;D_3__Candidatus Campbellbacteria;D_4__uncultured bacterium;D_5__uncultured bacterium;D_6__uncultured bacterium |
| cc1a20baae9c705d4ce4ddc21cd48ecb | 3 | 0.847305238 | D_0__Bacteria;D_1__Firmicutes;D_2__Clostridia;D_3__Clostridiales;D_4__Ruminococcaceae;D_5__Butyrivicoccus;Ambiguous_taxa                                             |
| d942bac17b1a69d8499fc1ac7c8b4dac | 3 | 0.984858379 | D_0__Bacteria;D_1__Bacteroidetes;D_2__Bacteroidia;D_3__Bacteroidales;D_4__Marinifilaceae;D_5__Marinifilum;D_6__uncultured Bacteroidetes bacterium                    |
| 8b4ba85d891e756d6829fb6162686bcf | 2 | 0.996213196 | D_0__Bacteria;D_1__Proteobacteria;D_2__Gammaproteobacteria;D_3__Oceanospirillales;D_4__Saccharospirillaceae;D_5__Oleispira;Ambiguous_taxa                            |
| be66204e7b2c9ca0be77a78be57aeb58 | 2 | 0.952091125 | D_0__Bacteria;D_1__Actinobacteria;D_2__Coriobacteriia;D_3__Coriobacteriales;D_4__Coriobacteriales Incertae Sedis;D_5__uncultured;D_6__uncultured bacterium           |
| daff3b4904237890080a447c6dfe4d40 | 2 | 0.832359493 | D_0__Bacteria;D_1__Patescibacteria;D_2__Gracilibacteria;D_3__JGI 0000069-P22;D_4__uncultured bacterium;D_5__uncultured bacterium;D_6__uncultured bacterium           |
| 295e65e6893355570920c42e3da53739 | 1 | 0.999935057 | D_0__Bacteria;D_1__Proteobacteria;D_2__Gammaproteobacteria;D_3__Alteromonadales;D_4__Alteromonadaceae                                                                |
| 4da211ba6ea0339b60009f074cc4d0e0 | 1 | 0.783727801 | D_0__Bacteria;D_1__Actinobacteria;D_2__Coriobacteriia;D_3__Coriobacteriales;D_4__Atopobiaceae;D_5__Atopobium;D_6__uncultured Coriobacteriaceae bacterium             |
| fb3df40abc0b26682babb06ac498989f | 1 | 0.963122268 | D_0__Bacteria;D_1__Proteobacteria;D_2__Gammaproteobacteria;D_3__Alteromonadales;D_4__Alteromonadaceae                                                                |

**Table S7.** ASVs found from *H. pilosus* with percentage of confidence  $\geq 75\%$ .

| Feature ID                       | Number of sequences | Confidence  | Taxon                                                                                                                                                                              |
|----------------------------------|---------------------|-------------|------------------------------------------------------------------------------------------------------------------------------------------------------------------------------------|
| 6a7e066c3fad35a215e4104aa89bff4a | 3882                | 0.977613476 | D_0__Bacteria;D_1__Bacteroidetes;D_2__Bacteroidia;D_3__Flavobacteriales;D_4__Flavobacteriaceae;D_5__NS5 marine group;Ambiguous_taxa                                                |
| b8e89b31d202d0f91db56a853e8fa35e | 1934                | 0.999992535 | D_0__Bacteria;D_1__Proteobacteria;D_2__Alphaproteobacteria;D_3__Caulobacteriales;D_4__Hyphomonadaceae;D_5__Robiginitomaculum                                                       |
| 00a80fb2e5b6d10a531c341927651e92 | 1130                | 0.75514023  | D_0__Bacteria;D_1__Proteobacteria;D_2__Alphaproteobacteria;D_3__Rhodobacterales;D_4__Rhodobacteraceae;D_5__Roseobacter clade NAC11-7 lineage;D_6__uncultured alpha proteobacterium |
| a660e09cb7abcf685efa1407a1e7ac81 | 1118                | 0.999999997 | D_0__Bacteria;D_1__Proteobacteria;D_2__Alphaproteobacteria;D_3__Rhodobacterales;D_4__Rhodobacteraceae                                                                              |
| e4887289324a32b29b9cd5f9f2945d84 | 1052                | 0.999999846 | D_0__Bacteria;D_1__Proteobacteria;D_2__Gammaproteobacteria;D_3__Oceanospirillales;D_4__Pseudohongiellaceae;D_5__Pseudohongiella                                                    |
| 7e3a7538d28877279afb650ad72e063c | 559                 | 0.998358455 | D_0__Bacteria;D_1__Proteobacteria;D_2__Gammaproteobacteria;D_3__K189A clade;Ambiguous_taxa;Ambiguous_taxa;Ambiguous_taxa                                                           |
| 775cf63863803484cc269b57f8480f06 | 544                 | 0.793784399 | D_0__Bacteria;D_1__Proteobacteria;D_2__Gammaproteobacteria;D_3__Tenderiales;D_4__Tenderiaceae;D_5__Candidatus Tenderia;D_6__uncultured gamma proteobacterium                       |
| d83bf1a83ba09c470f55f6c15cfe1a4a | 419                 | 0.871432659 | D_0__Archaea;D_1__Thaumarchaeota;D_2__Nitrososphaeria;D_3__Nitrosopumilales;D_4__Nitrosopumilaceae;D_5__Candidatus Nitrosopumilus                                                  |
| 9ed5ea3d900ceda3d4b386816ee4ef92 | 396                 | 0.999999968 | D_0__Bacteria;D_1__Proteobacteria;D_2__Deltaproteobacteria;D_3__Bdellovibrionales;D_4__Bdellovibrionaceae;D_5__Bdellovibrio                                                        |
| 508baf54718ae7094689191a66899ba3 | 294                 | 0.999991272 | D_0__Bacteria;D_1__Proteobacteria;D_2__Gammaproteobacteria;D_3__UBA10353 marine group                                                                                              |
| 155289cff466171178063805d2a3319b | 280                 | 0.909067567 | D_0__Bacteria;D_1__Proteobacteria;D_2__Gammaproteobacteria;D_3__Steroidobacteriales;D_4__Woeseiaceae;D_5__Woeseia                                                                  |
| 6cbaf2a2e24d8dc1a6e13b3bd71bce78 | 228                 | 0.971862011 | D_0__Bacteria;D_1__Proteobacteria;D_2__Gammaproteobacteria;D_3__JTB23                                                                                                              |
| 2401cfdd7aae2d2977a422acc798c0b9 | 213                 | 0.999044233 | D_0__Bacteria;D_1__Actinobacteria;D_2__Acidimicrobiia;D_3__Microtrichales;D_4__Microtrichaceae;D_5__Sva0996 marine group;D_6__uncultured organism                                  |
| dc898434231409883e60c022df816362 | 199                 | 0.999699272 | D_0__Bacteria;D_1__Proteobacteria;D_2__Gammaproteobacteria;D_3__Cellvibrionales                                                                                                    |

|                                  |     |             |                                                                                                                                                                                    |
|----------------------------------|-----|-------------|------------------------------------------------------------------------------------------------------------------------------------------------------------------------------------|
| 8f5b60e2ef54d12840bd47faa5616cab | 191 | 0.963474653 | D_0__Bacteria;D_1__Proteobacteria;D_2__Alphaproteobacteria;D_3__Thalassobaculales;D_4__Nisaeaceae;D_5__OM75 clade;D_6__uncultured alpha proteobacterium                            |
| ec145354454885b65f8fa2a7d9464543 | 76  | 0.972176791 | D_0__Bacteria;D_1__Bacteroidetes;D_2__Bacteroidia;D_3__Flavobacteriales;D_4__Flavobacteriaceae;D_5__NS5 marine group;Ambiguous_taxa                                                |
| e9ac73db852dad95a70f25e4f63b8e1a | 64  | 0.999990894 | D_0__Bacteria;D_1__Proteobacteria;D_2__Alphaproteobacteria;D_3__Caulobacteriales;D_4__Hyphomonadaceae;D_5__Robiginitomaculum                                                       |
| b593eca7682213ae9045b637757739a5 | 61  | 0.999999943 | D_0__Bacteria;D_1__Proteobacteria;D_2__Deltaproteobacteria;D_3__Bdellovibrionales;D_4__Bdellovibrionaceae;D_5__Bdellovibrio                                                        |
| 7c1be5aa888860516751b219fb83ece8 | 50  | 0.78800496  | D_0__Bacteria;D_1__Proteobacteria;D_2__Alphaproteobacteria;D_3__Rhodobacterales;D_4__Rhodobacteraceae;D_5__Roseobacter clade NAC11-7 lineage;D_6__uncultured alpha proteobacterium |
| 53ed70e9e9cb94365506e1cb76933fa0 | 48  | 0.992509086 | D_0__Bacteria                                                                                                                                                                      |
| ee0f5caff94365896ef095e26d1fed6d | 48  | 0.749932806 | D_0__Bacteria;D_1__Proteobacteria;D_2__Alphaproteobacteria;D_3__SAR11 clade;D_4__Clade I;D_5__Clade Ia                                                                             |
| 16ac7540cf6e429f02f3ec1921bc4e22 | 45  | 0.999999996 | D_0__Bacteria;D_1__Proteobacteria;D_2__Alphaproteobacteria;D_3__Rhodobacterales;D_4__Rhodobacteraceae                                                                              |
| 5d9835c028d02be320fdd0c95eb23f4f | 32  | 0.82943598  | D_0__Bacteria;D_1__Bacteroidetes;D_2__Bacteroidia;D_3__Flavobacteriales;D_4__Flavobacteriaceae;D_5__Polaribacter 1;Ambiguous_taxa                                                  |
| 74818e9c275df1d2842b9d4ef8ae3fc5 | 32  | 0.995895467 | D_0__Bacteria;D_1__Proteobacteria;D_2__Gammaproteobacteria;D_3__KI89A clade;Ambiguous_taxa;Ambiguous_taxa;Ambiguous_taxa                                                           |
| 8547a0a71e8c173be5e253364f24957d | 16  | 0.999999836 | D_0__Bacteria;D_1__Patescibacteria;D_2__Parcubacteria;D_3__Candidatus Campbellbacteria;D_4__uncultured bacterium;D_5__uncultured bacterium;D_6__uncultured                         |
| dfb9078f726f9b239561ae7a04e4c445 | 15  | 0.997416652 | D_0__Bacteria;D_1__Proteobacteria;D_2__Gammaproteobacteria;D_3__Oceanospirillales;D_4__Nitrocolaceae;D_5__uncultured;D_6__uncultured marine bacterium                              |
| 422b267b273b1af947e80657c47c8072 | 13  | 0.999501022 | D_0__Bacteria;D_1__Lentisphaerae;D_2__Lentisphaeria;D_3__Lentisphaerales;D_4__Lentisphaeraeae;D_5__Lentisphaera                                                                    |
| ce42b14845e10ad958ca1cb53045dbca | 12  | 0.995966837 | D_0__Bacteria;D_1__Proteobacteria;D_2__Gammaproteobacteria;D_3__Alteromonadales;D_4__Colwelliaceae;D_5__Colwellia                                                                  |
| 085f909fd9aedf1a0bbd3798cf5279b  | 8   | 0.887600266 | D_0__Bacteria;D_1__Proteobacteria;D_2__Gammaproteobacteria;D_3__Thiomicrospirales;D_4__Thioglobaceae;D_5__SUP05 cluster;D_6__uncultured marine bacterium                           |
| ece89bff980b08b04d6f8dbe287592c3 | 7   | 0.999999069 | D_0__Bacteria;D_1__Epsilonbacteraeota;D_2__Campylobacteria;D_3__Campylobacteriales;D_4__Arcobacteraceae;D_5__Arcobacter                                                            |

|                                  |   |             |                                                                                                                                                      |
|----------------------------------|---|-------------|------------------------------------------------------------------------------------------------------------------------------------------------------|
| ed347145ab935ef912e1f90fe9590298 | 7 | 0.886294614 | D_0__Bacteria;D_1__Proteobacteria;D_2__Gammaproteobacteria;D_3__Alteromonadales;D_4__Colwelliaceae;D_5__Colwellia                                    |
| 25931e17ea6c6d8fd57a5230fec2c625 | 5 | 0.939286821 | D_0__Bacteria;D_1__Proteobacteria;D_2__Alphaproteobacteria;D_3__Parvibaculales;D_4__PS1 clade;D_5__uncultured bacterium;D_6__uncultured bacterium    |
| 54397cb35127b6a5df751155b7461547 | 4 | 0.748330375 | D_0__Bacteria;D_1__Proteobacteria;D_2__Gammaproteobacteria;D_3__Cellvibrionales;D_4__Porticocaceae;D_5__SAR92 clade;D_6__uncultured marine bacterium |
| 177920551a2a705a66e2f4a2663d4561 | 3 | 0.927689543 | D_0__Bacteria;D_1__Bacteroidetes;D_2__Bacteroidia;D_3__Flavobacteriales;D_4__Cryomorphaceae;D_5__uncultured;D_6__marine metagenome                   |
| 1db50f814d8a99be5666486f4a4de024 | 3 | 0.999094451 | D_0__Bacteria;D_1__Bacteroidetes;D_2__Bacteroidia;D_3__Flavobacteriales;D_4__Flavobacteriaceae;D_5__NS2b marine group                                |
| 3dfd78ec33126f07b602cf3e31bbde97 | 3 | 0.998655009 | D_0__Bacteria;D_1__Proteobacteria;D_2__Gammaproteobacteria;D_3__Alteromonadales;D_4__Alteromonadaceae;D_5__Paraglaciecola;Ambiguous_taxa             |
| 9646e8e963bfa6d3658a2e4db796657f | 3 | 0.85862286  | D_0__Bacteria;D_1__Proteobacteria;D_2__Gammaproteobacteria;D_3__Alteromonadales;D_4__Colwelliaceae;D_5__Colwellia                                    |
| ba99a570c2761e419c443a97c0ea39d3 | 3 | 0.999999975 | D_0__Bacteria;D_1__Epsilonbacteraeota;D_2__Campylobacteria;D_3__Campylobacteriales;D_4__Arcobacteraceae;D_5__Arcobacter                              |
| 28708382f55f006ce34f01206e5abd54 | 2 | 0.978943092 | D_0__Bacteria                                                                                                                                        |
| d50919d54541b225899cc06110d14e29 | 2 | 0.994562885 | D_0__Bacteria;D_1__Bacteroidetes;D_2__Bacteroidia;D_3__Flavobacteriales;D_4__Cryomorphaceae;D_5__uncultured;D_6__uncultured Flavobacteriia bacterium |
| 17ac0de31a0f390831256c95971fe063 | 1 | 0.999999997 | D_0__Bacteria;D_1__Proteobacteria;D_2__Gammaproteobacteria                                                                                           |
| 3dfb18f9278b81c2508361494d586e23 | 1 | 0.780506511 | D_0__Bacteria;D_1__Proteobacteria;D_2__Gammaproteobacteria;D_3__Alteromonadales                                                                      |
| 5b1e245cd77376d116b32903bd8eb50e | 1 | 0.808646049 | D_0__Bacteria;D_1__Proteobacteria;D_2__Gammaproteobacteria;D_3__Alteromonadales;D_4__Moritellaceae                                                   |
| d08b4ba7275c9769d6cfe9d220c24ac7 | 1 | 0.806919402 | D_0__Bacteria;D_1__Proteobacteria;D_2__Gammaproteobacteria;D_3__Alteromonadales;D_4__Moritellaceae;D_5__Moritella                                    |
| d689cd003ad6e8c86be92e1ac114ff9d | 1 | 0.827327601 | D_0__Bacteria;D_1__Proteobacteria;D_2__Alphaproteobacteria;D_3__Rhodobacterales;D_4__Rhodobacteraceae                                                |
| db4c9169139fd731339514a79da0567a | 1 | 0.826185459 | D_0__Bacteria;D_1__Proteobacteria;D_2__Gammaproteobacteria;D_3__Alteromonadales;D_4__Moritellaceae;D_5__Moritella                                    |



**Table S8.** ASVs found from *M. sarai* with percentage of confidence  $\geq 75\%$ .

| Feature ID                       | Number of sequences | Confidence  | Taxon                                                                                                                                                                         |
|----------------------------------|---------------------|-------------|-------------------------------------------------------------------------------------------------------------------------------------------------------------------------------|
| 3893f274e96d4cc70e9f44136fec7477 | 4605                | 0.790016759 | D_0__Bacteria;D_1__Proteobacteria;D_2__Gammaproteobacteria;D_3__Betaproteobacteriales;D_4__EC94;D_5__uncultured bacterium;D_6__uncultured bacterium                           |
| c3267a32e1403cf02ac84957f2cbb902 | 1808                | 0.937720316 | D_0__Bacteria;D_1__Proteobacteria;D_2__Gammaproteobacteria;D_3__Betaproteobacteriales;D_4__EC94;Ambiguous_taxa;Ambiguous_taxa                                                 |
| 1d5a7a4ffdf2def18e8c51a31ac52022 | 1451                | 0.954210628 | D_0__Bacteria;D_1__Proteobacteria;D_2__Gammaproteobacteria;D_3__Betaproteobacteriales;D_4__EC94;Ambiguous_taxa;Ambiguous_taxa                                                 |
| 011cd7959322e1d5e2949938bfc0ed59 | 818                 | 0.994228284 | D_0__Bacteria                                                                                                                                                                 |
| 5d9835c028d02be320fdd0c95eb23f4f | 612                 | 0.82943598  | D_0__Bacteria;D_1__Bacteroidetes;D_2__Bacteroidia;D_3__Flavobacteriales;D_4__Flavobacteriaceae;D_5__Polaribacter 1;Ambiguous_taxa                                             |
| 7bca951215ee55fad72ca4245f276361 | 477                 | 0.98477904  | D_0__Bacteria;D_1__Bacteroidetes;D_2__Bacteroidia;D_3__Cytophagales;D_4__Cyclobacteriaceae;D_5__Ekhidna;D_6__uncultured bacterium                                             |
| 983f6b74e25c3d36c9d9940508779742 | 325                 | 0.999716167 | D_0__Bacteria;D_1__Proteobacteria;D_2__Alphaproteobacteria                                                                                                                    |
| ee0f5caff94365896ef095e26d1fed6d | 194                 | 0.749932806 | D_0__Bacteria;D_1__Proteobacteria;D_2__Alphaproteobacteria;D_3__SAR11 clade;D_4__Clade I;D_5__Clade Ia                                                                        |
| cb1103feca0f73cffe3e11aa250b31fd | 136                 | 0.995767309 | D_0__Bacteria;D_1__Proteobacteria;D_2__Gammaproteobacteria                                                                                                                    |
| d5533bb4f1f8f99cd6ab0d4513071e63 | 102                 | 0.846784887 | D_0__Bacteria;D_1__Proteobacteria;D_2__Deltaproteobacteria;D_3__Bdellovibrionales;D_4__Bacteri ovoracaceae;D_5__Peredibacter;D_6__marine snow associated bacterium Adriatic33 |
| 9067ee2adb6a587bc491759a28206ef3 | 97                  | 0.999879885 | D_0__Bacteria;D_1__Proteobacteria;D_2__Gammaproteobacteria                                                                                                                    |
| ccb67f3a797ef786dc0c42cf3b8bd220 | 62                  | 0.999963971 | D_0__Bacteria;D_1__Proteobacteria;D_2__Gammaproteobacteria;D_3__Alteromonadales;D_4__Colwelliaceae;D_5__Colwellia                                                             |
| ce42b14845e10ad958ca1cb53045dbca | 60                  | 0.995966837 | D_0__Bacteria;D_1__Proteobacteria;D_2__Gammaproteobacteria;D_3__Alteromonadales;D_4__Colwelliaceae;D_5__Colwellia                                                             |
| 8ad347d406777a81fcd8cfe37ca1c6c0 | 48                  | 0.999546718 | D_0__Bacteria;D_1__Proteobacteria;D_2__Gammaproteobacteria                                                                                                                    |

|                                  |    |             |                                                                                                                                                          |
|----------------------------------|----|-------------|----------------------------------------------------------------------------------------------------------------------------------------------------------|
| dfb9078f726f9b239561ae7a04e4c445 | 42 | 0.997416652 | D_0__Bacteria;D_1__Proteobacteria;D_2__Gammaproteobacteria;D_3__Oceanospirillales;D_4__Nitrincolaceae;D_5__uncultured;D_6__uncultured marine bacterium   |
| 09f3ca0e70a9a5172f54c951440f80a1 | 39 | 0.999609525 | D_0__Bacteria;D_1__Bacteroidetes;D_2__Bacteroidia;D_3__Flavobacteriales;D_4__NS9 marine group;D_5__seawater metagenome;D_6__seawater metagenome          |
| d981719504755a2c4d1d38004b3f25bb | 39 | 0.843412938 | D_0__Bacteria;D_1__Proteobacteria;D_2__Gammaproteobacteria;D_3__Thiomicrospirales;D_4__Thioglobaceae;D_5__SUP05 cluster;D_6__uncultured marine bacterium |
| ece89bff980b08b04d6f8dbe287592c3 | 39 | 0.999999069 | D_0__Bacteria;D_1__Epsilonbacteraeota;D_2__Campylobacteria;D_3__Campylobacteriales;D_4__Arcobacteraceae;D_5__Arcobacter                                  |
| 085f909fd9a9edf1a0bbd3798cf5279b | 37 | 0.887600266 | D_0__Bacteria;D_1__Proteobacteria;D_2__Gammaproteobacteria;D_3__Thiomicrospirales;D_4__Thioglobaceae;D_5__SUP05 cluster;D_6__uncultured marine bacterium |
| 1db50f814d8a99be5666486f4a4de024 | 32 | 0.999094451 | D_0__Bacteria;D_1__Bacteroidetes;D_2__Bacteroidia;D_3__Flavobacteriales;D_4__Flavobacteriaceae;D_5__NS2b marine group                                    |
| 2ed5317eed5cca5f24215fae43088517 | 29 | 0.953567109 | D_0__Bacteria;D_1__Bacteroidetes;D_2__Bacteroidia;D_3__Flavobacteriales;D_4__Flavobacteriaceae;D_5__[Polaribacter] huanghezhanensis;Ambiguous_taxa       |
| 43312cc49398d40c07f6e6122d592887 | 28 | 0.991274966 | D_0__Archaea;D_1__Thaumarchaeota;D_2__Nitrososphaeria;D_3__Nitrosopumilales;D_4__Nitrosopumilaceae;D_5__Candidatus Nitrosopumilus                        |
| 6f8cc8a570ce8fcb99f9fcb9e1d5971a | 26 | 0.999999987 | D_0__Bacteria;D_1__Bacteroidetes;D_2__Bacteroidia;D_3__Flavobacteriales;D_4__Flavobacteriaceae;D_5__NS4 marine group                                     |
| 8b1d800c36d922ac85239ca5f576d0ff | 26 | 0.782848771 | D_0__Bacteria;D_1__Bacteroidetes;D_2__Bacteroidia;D_3__Flavobacteriales;D_4__NS9 marine group;D_5__uncultured bacterium;D_6__uncultured bacterium        |
| a09fd242d4bbdae1944d1b43ab0a33e9 | 26 | 0.926647049 | D_0__Bacteria;D_1__Bacteroidetes;D_2__Bacteroidia;D_3__Flavobacteriales;D_4__Flavobacteriaceae;D_5__uncultured;D_6__uncultured marine bacterium          |
| a7bf0266830b194e5ffd0cb22c0effa1 | 20 | 0.863165323 | D_0__Bacteria;D_1__Bacteroidetes;D_2__Bacteroidia;D_3__Flavobacteriales;D_4__Flavobacteriaceae;D_5__Polaribacter 1;Ambiguous_taxa                        |
| ed347145ab935ef912e1f90fe9590298 | 19 | 0.886294614 | D_0__Bacteria;D_1__Proteobacteria;D_2__Gammaproteobacteria;D_3__Alteromonadales;D_4__Colwelliaceae;D_5__Colwellia                                        |
| 58d4ccc3b5caaca78eb060f7a2d1d9ee | 18 | 1           | D_0__Bacteria;D_1__Proteobacteria;D_2__Alphaproteobacteria;D_3__SAR11 clade                                                                              |
| 7874f80382e597a6eb3bf95a6defd394 | 17 | 0.875967844 | D_0__Bacteria;D_1__Fusobacteria;D_2__Fusobacteriia;D_3__Fusobacteriales;D_4__Fusobacteriaceae;D_5__Psychrilyobacter;D_6__uncultured bacterium            |
| e007a5a33100efaa889829480150a396 | 16 | 0.999999998 | D_0__Bacteria;D_1__Planctomycetes;D_2__Phycisphaerae;D_3__Phycisphaerales;D_4__Phycisphaeraeae;D_5__JL-ETNP-F27                                          |

|                                  |    |             |                                                                                                                                              |
|----------------------------------|----|-------------|----------------------------------------------------------------------------------------------------------------------------------------------|
| e6e4648a60dfe431e5ae2c981eb1ae87 | 16 | 0.767008572 | D_0__Bacteria;D_1__Spirochaetes;D_2__Leptospirae;D_3__Leptospirales;D_4__Leptospiraceae;D_5__Turneriella;D_6__metagenome                     |
| 177920551a2a705a66e2f4a2663d4561 | 15 | 0.927689543 | D_0__Bacteria;D_1__Bacteroidetes;D_2__Bacteroidia;D_3__Flavobacteriales;D_4__Cryomorphaceae;D_5__uncultured;D_6__marine metagenome           |
| 51f4a36ffc035b291789656685592f35 | 15 | 0.841127864 | D_0__Bacteria;D_1__Proteobacteria;D_2__Gammaproteobacteria;D_3__Alteromonadales;D_4__Shewanellaceae;D_5__Ferrimonas;Ambiguous_taxa           |
| 71dac9bd043cd476f40ef2d5e7bb28fa | 14 | 0.999999551 | D_0__Bacteria;D_1__Proteobacteria;D_2__Gammaproteobacteria;D_3__Alteromonadales;D_4__Psychromonadaceae;D_5__Psychromonas                     |
| 146d2cd899ac43e7ba5da85a562451c8 | 13 | 0.99080369  | D_0__Bacteria;D_1__Bacteroidetes;D_2__Bacteroidia;D_3__Flavobacteriales;D_4__Flavobacteriaceae;D_5__Aurantivirga;Ambiguous_taxa              |
| 72ab946b81e68afd44dae98c7d4dceb8 | 13 | 0.818021979 | D_0__Bacteria;D_1__Planctomycetes;D_2__Phycisphaerae;D_3__Phycisphaerales;D_4__Phycisphaeraeae;D_5__FS140-16B-02 marine group;Ambiguous_taxa |
| 0aebc7c8b90e3922ae2960d6bc6ba3f8 | 12 | 0.968351558 | D_0__Bacteria;D_1__Proteobacteria;D_2__Gammaproteobacteria;D_3__Alteromonadales;D_4__Moritellaceae;D_5__Moritella;Ambiguous_taxa             |
| 5ef5daa696583f4b2c8c967c2bc6ac6e | 12 | 0.750595606 | D_0__Bacteria;D_1__Proteobacteria;D_2__Gammaproteobacteria;D_3__Cellvibrionales;D_4__Portococcaceae;D_5__C1-B045;D_6__Cladosiphon okamuranus |
| a1ab33754f725190a46a5ab09b97314c | 12 | 0.934379771 | D_0__Bacteria;D_1__Proteobacteria;D_2__Alphaproteobacteria;D_3__Rhodobacterales;D_4__Rhodobacteraceae;D_5__Planktomarina                     |
| c87228fb6f3d84df43335fb48673a6aa | 12 | 0.968020252 | D_0__Bacteria;D_1__Bacteroidetes;D_2__Bacteroidia;D_3__Bacteroidales;D_4__Bacteroidaceae;D_5__Bacteroides;D_6__uncultured bacterium          |
| 5d6c93c193027c8343ac09042db51049 | 11 | 1           | D_0__Bacteria;D_1__Planctomycetes;D_2__Phycisphaerae;D_3__Phycisphaerales;D_4__Phycisphaeraeae;D_5__JL-ETNP-F27                              |
| 04e1d5fe2db1e05d3f7464d881e335db | 10 | 0.999999631 | D_0__Bacteria;D_1__Epsilonbacteraeota;D_2__Campylobacteria;D_3__Campylobacterales;D_4__Arcobacteraceae;D_5__Arcobacter                       |
| 96b6bb9bc81a32759c28a823d202c9c5 | 10 | 0.990004753 | D_0__Bacteria;D_1__Bacteroidetes;D_2__Bacteroidia;D_3__Flavobacteriales;D_4__Flavobacteriaceae;D_5__NS5 marine group;Ambiguous_taxa          |
| a32ba414e0374b023f41d7a7d80df3a9 | 10 | 0.998982167 | D_0__Bacteria;D_1__Bacteroidetes;D_2__Bacteroidia;D_3__Flavobacteriales;D_4__Flavobacteriaceae;D_5__Ulvibacter;D_6__uncultured bacterium     |
| 2fe8d6838909663a039294cf48ea3720 | 9  | 1           | D_0__Bacteria;D_1__Firmicutes;D_2__Clostridia;D_3__Clostridiales;D_4__Peptostreptococcaceae;D_5__Peptostreptococcus                          |
| 35edd74e500829f34672c77fe135a4d8 | 9  | 1           | D_0__Bacteria;D_1__Bacteroidetes;D_2__Bacteroidia;D_3__Flavobacteriales;D_4__Flavobacteriaceae                                               |

|                                  |   |             |                                                                                                                                                                   |
|----------------------------------|---|-------------|-------------------------------------------------------------------------------------------------------------------------------------------------------------------|
| b45ad382acdfdda9b261dd9f408b9a41 | 9 | 0.891074376 | D_0__Bacteria;D_1__Fusobacteria;D_2__Fusobacteriia;D_3__Fusobacteriales;D_4__Fusobacteriaceae;D_5__Cetobacterium;D_6__uncultured bacterium                        |
| cc82292bf4dabc6ee88ae87d79c1177f | 9 | 1           | D_0__Bacteria;D_1__Proteobacteria;D_2__Alphaproteobacteria;D_3__Rhodobacterales;D_4__Rhodobacteraceae                                                             |
| 113ca0d78dfbab0cc1c8b13f7344ffe3 | 8 | 0.76008117  | D_0__Bacteria;D_1__Proteobacteria;D_2__Gammaproteobacteria;D_3__Cellvibrionales;D_4__Porticocaceae;D_5__SAR92 clade;D_6__uncultured marine bacterium              |
| 197fa7485a53351f83c841134ba5675c | 8 | 0.934418961 | D_0__Bacteria;D_1__Bacteroidetes;D_2__Bacteroidia;D_3__Cytophagales;D_4__Cyclobacteriaceae;D_5__Ekhidna;D_6__uncultured bacterium                                 |
| 350073d106270d03bfabb454f3756aa2 | 8 | 0.995368165 | D_0__Bacteria;D_1__Proteobacteria;D_2__Gammaproteobacteria;D_3__Alteromonadales;D_4__Alteromonadaceae;D_5__Paraglaciecola;Ambiguous_taxa                          |
| 4071f0397c05488b3cab337f4c7e9bef | 8 | 0.997024978 | D_0__Bacteria;D_1__Bacteroidetes;D_2__Bacteroidia;D_3__Flavobacteriales;D_4__Flavobacteriaceae;D_5__Polaribacter 1                                                |
| 8b7d1dd5792eef291d006590ae917a94 | 8 | 0.988433233 | D_0__Bacteria;D_1__Bacteroidetes;D_2__Bacteroidia;D_3__Flavobacteriales;D_4__Flavobacteriaceae;D_5__NS5 marine group;D_6__uncultured bacterium ARCTIC26_B_07      |
| 9073f1da59db31cfe0580916658da539 | 8 | 0.99999014  | D_0__Bacteria;D_1__Proteobacteria;D_2__Alphaproteobacteria;D_3__SAR11 clade;D_4__Clade IV;Ambiguous_taxa;Ambiguous_taxa                                           |
| a8a20fd9974fb8fac63672894bb35170 | 8 | 0.999756607 | D_0__Bacteria;D_1__Bacteroidetes;D_2__Bacteroidia;D_3__Flavobacteriales;D_4__NS9 marine group;D_5__hydrothermal vent metagenome;D_6__hydrothermal vent metagenome |
| b24b157400490f3df9bf86bb2e09d90b | 8 | 0.992283502 | D_0__Bacteria;D_1__Planctomycetes;D_2__Phycisphaerae;D_3__Phycisphaerales;D_4__Phycisphaera ceae;D_5__FS140-16B-02 marine group;D_6__uncultured bacterium         |
| b51ebea7e128a204c4827541f01193fb | 8 | 0.947404044 | D_0__Bacteria;D_1__Bacteroidetes;D_2__Bacteroidia;D_3__Bacteroidales;D_4__Bacteroidaceae;D_5__Bacteroides;D_6__uncultured bacterium                               |
| b80321b3d96fe17546da5b172528118e | 8 | 0.999891983 | D_0__Bacteria;D_1__Proteobacteria;D_2__Gammaproteobacteria;D_3__Oceanospirillales;D_4__Nitri ncolaceae;D_5__Profundimonas;Ambiguous_taxa                          |
| fa5d7e11432c8e7ab07590c5bd25d55e | 8 | 0.999999999 | D_0__Bacteria;D_1__Proteobacteria;D_2__Alphaproteobacteria;D_3__Rhodobacterales;D_4__Rhodobacteraceae                                                             |
| 2d1527fdf206a9dbf8f3702b90d68ce8 | 7 | 0.753968916 | D_0__Bacteria;D_1__Spirochaetes;D_2__Leptospirae;D_3__Leptospirales;D_4__Leptospiraceae;D_5__uncultured                                                           |
| 3ff67ff349463e155e421199e745409b | 7 | 0.999999997 | D_0__Bacteria;D_1__Planctomycetes;D_2__Planctomycetacia;D_3__Pirellulales;D_4__Pirellulaceae;D_5__Blastopirellula                                                 |
| 43adac1596ede1dd88ea74502011a729 | 7 | 0.999306936 | D_0__Bacteria;D_1__Proteobacteria;D_2__Gammaproteobacteria;D_3__Steroidobacteriales;D_4__Woeseiaceae;D_5__Woeseia;D_6__uncultured marine bacterium                |

|                                   |   |             |                                                                                                                                                                                    |
|-----------------------------------|---|-------------|------------------------------------------------------------------------------------------------------------------------------------------------------------------------------------|
| 79762d2abcbcd928b75e0b39c675d5424 | 7 | 0.904765981 | D_0__Bacteria;D_1__Bacteroidetes;D_2__Bacteroidia;D_3__Bacteroidales;D_4__Rikenellaceae;D_5__Alistipes;D_6__uncultured bacterium                                                   |
| 9390711f3044e7aba9cb577a0aaaf34e  | 7 | 0.999999983 | D_0__Bacteria;D_1__Bacteroidetes;D_2__Bacteroidia;D_3__Flavobacteriales;D_4__Flavobacteriaceae;D_5__Pseudofulvibacter                                                              |
| b2ec1271704b44ad94883257227b11df  | 7 | 0.876150587 | D_0__Bacteria;D_1__Proteobacteria;D_2__Gammaproteobacteria;D_3__Cellvibrionales;D_4__Portococaceae;D_5__C1-B045;D_6__Cladosiphon okamuranus                                        |
| d942bac17b1a69d8499fc1ac7c8b4dac  | 7 | 0.984858379 | D_0__Bacteria;D_1__Bacteroidetes;D_2__Bacteroidia;D_3__Bacteroidales;D_4__Marinifilaceae;D_5__Marinifilum;D_6__uncultured Bacteroidetes bacterium                                  |
| e147fdb14fbbdd2b7e9f974c42603e0   | 7 | 0.999996332 | D_0__Bacteria;D_1__Proteobacteria;D_2__Gammaproteobacteria;D_3__Alteromonadales;D_4__Shewanellaceae;D_5__Psychrobium                                                               |
| e1b000731bf1b4ab30332e90d5da12fd  | 7 | 0.984201195 | D_0__Bacteria;D_1__Bacteroidetes;D_2__Bacteroidia;D_3__Bacteroidales;D_4__Rikenellaceae;D_5__Alistipes;D_6__uncultured bacterium                                                   |
| 00a80fb2e5b6d10a531c341927651e92  | 6 | 0.75514023  | D_0__Bacteria;D_1__Proteobacteria;D_2__Alphaproteobacteria;D_3__Rhodobacterales;D_4__Rhodobacteraceae;D_5__Roseobacter clade NAC11-7 lineage;D_6__uncultured alpha proteobacterium |
| 12d1684808f0df24b75a71c8bf8ccd56  | 6 | 0.99975945  | D_0__Bacteria;D_1__Proteobacteria;D_2__Gammaproteobacteria;D_3__Cellvibrionales;D_4__Halieaceae;D_5__OM60(NOR5) clade                                                              |
| 443ec713433d2a2beece7932060554c0  | 6 | 0.999999985 | D_0__Bacteria;D_1__Epsilonbacteraeota;D_2__Campylobacteria;D_3__Campylobacteriales;D_4__Arcobacteraceae;D_5__Arcobacter                                                            |
| 4da211ba6ea0339b60009f074cc4d0e0  | 6 | 0.783727801 | D_0__Bacteria;D_1__Actinobacteria;D_2__Coriobacteriia;D_3__Coriobacteriales;D_4__Atopobiaceae;D_5__Atopobium;D_6__uncultured Coriobacteriaceae bacterium                           |
| 60a8eb1607d40d20a96caadce2d139c6  | 6 | 0.992260838 | D_0__Bacteria;D_1__Proteobacteria;D_2__Gammaproteobacteria;D_3__Oceanospirillales;D_4__Pseudohongiellaceae;D_5__Pseudohongiella;D_6__uncultured marine bacterium                   |
| 63a8d5a3a8791f53fae465b038315d2a  | 6 | 0.93554543  | D_0__Bacteria;D_1__Bacteroidetes;D_2__Bacteroidia;D_3__Bacteroidales;D_4__Marinifilaceae;D_5__uncultured;Ambiguous_taxa                                                            |
| a318c488bbc906c5166e934ea935ddd6  | 6 | 0.856710524 | D_0__Bacteria;D_1__Nitrospinae;D_2__Nitrospina;D_3__Nitrospinales;D_4__Nitrospinae;D_5__LS-NOB;D_6__uncultured delta proteobacterium                                               |
| abdbe9456e55bfa79d5ec2ef030deb43  | 6 | 0.997785995 | D_0__Bacteria;D_1__Patescibacteria;D_2__Gracilibacteria;D_3__uncultured bacterium;D_4__uncultured bacterium;D_5__uncultured bacterium;D_6__uncultured bacterium                    |
| e249ebb7b48c0afd3c421d36e989c87a  | 6 | 0.992511423 | D_0__Bacteria;D_1__Planctomycetes;D_2__Phycisphaerae;D_3__Phycisphaerales;D_4__Phycisphaeraeae;D_5__CL500-3;Ambiguous_taxa                                                         |
| 3f9aab3f978fca06b2e018c352a72b97  | 5 | 0.845134855 | D_0__Bacteria;D_1__Proteobacteria;D_2__Gammaproteobacteria;D_3__Betaproteobacteriales;D_4__Methylophilaceae;D_5__OM43 clade;D_6__uncultured organism                               |

|                                  |   |             |                                                                                                                                                                                                                       |
|----------------------------------|---|-------------|-----------------------------------------------------------------------------------------------------------------------------------------------------------------------------------------------------------------------|
| 4fea4c7f3485c1c417cdd94a20b1271f | 5 | 0.999791177 | D_0__Bacteria;D_1__Proteobacteria;D_2__Alphaproteobacteria;D_3__Parvibaculales;D_4__Parvibaculaceae;D_5__uncultured;Ambiguous_taxa                                                                                    |
| 5bddb82944e47ce930542b6cc2cec5bb | 5 | 0.936341911 | D_0__Bacteria;D_1__Proteobacteria;D_2__Alphaproteobacteria;D_3__Puniceispirillales;D_4__SAR116 clade;D_5__uncultured marine bacterium;D_6__uncultured marine bacterium                                                |
| 67bd572773f3d10297941e4d5aa8fbda | 5 | 0.999919553 | D_0__Bacteria;D_1__Marinimicrobia (SAR406 clade);D_2__uncultured marine bacterium;D_3__uncultured marine bacterium;D_4__uncultured marine bacterium;D_5__uncultured marine bacterium;D_6__uncultured marine bacterium |
| 690b115eebd20dbe59a39553854f51f9 | 5 | 0.999975583 | D_0__Bacteria;D_1__Proteobacteria;D_2__Alphaproteobacteria;D_3__uncultured                                                                                                                                            |
| 7b7afb455fc96b0b2aa4a17f9a5dbd0a | 5 | 0.923579305 | D_0__Bacteria;D_1__Bacteroidetes;D_2__Bacteroidia;D_3__Flavobacteriales;D_4__NS9 marine group;D_5__uncultured marine bacterium;D_6__uncultured marine bacterium                                                       |
| a7e09914eeb30a7fbd752cd174474a55 | 5 | 0.998192618 | D_0__Bacteria;D_1__Verrucomicrobia;D_2__Verrucomicrobiae;D_3__Verrucomicrobiales;D_4__Rubritaleaceae;D_5__Rubritalea;D_6__uncultured bacterium                                                                        |
| ba99a570c2761e419c443a97c0ea39d3 | 5 | 0.999999975 | D_0__Bacteria;D_1__Epsilonbacteraeota;D_2__Campylobacteria;D_3__Campylobacteriales;D_4__Arcobacteraceae;D_5__Arcobacter                                                                                               |
| fed8160f587c4ce15fde645541293117 | 5 | 0.999897816 | D_0__Bacteria;D_1__Nitrospinae;D_2__Nitrospina;D_3__Nitrospinales;D_4__Nitrospinaceae;D_5__Nitrospina                                                                                                                 |
| 0806215b5b0ea280961ac91fee9cffe  | 4 | 0.999999555 | D_0__Bacteria;D_1__Proteobacteria;D_2__Gammaproteobacteria;D_3__SAR86 clade                                                                                                                                           |
| 0ab95cab67a77cfdcc279c77735436   | 4 | 0.997926476 | D_0__Bacteria;D_1__Planctomycetes;D_2__Planctomycetacia;D_3__Pirellulales;D_4__Pirellulaceae;D_5__Rhodopirellula;D_6__marine metagenome                                                                               |
| 2e1b6e797697e572ca82dd224d99d79b | 4 | 0.999998257 | D_0__Bacteria;D_1__Bacteroidetes;D_2__Bacteroidia;D_3__Bacteroidales;D_4__Marinifilaceae;D_5__Marinifilum                                                                                                             |
| 7a4321e429e11674a5ef2c41c8619231 | 4 | 0.998746714 | D_0__Bacteria;D_1__Bacteroidetes;D_2__Bacteroidia;D_3__Chitinophagales;D_4__uncultured;D_5__bacterium episymbiont of Kiwa sp.;D_6__bacterium episymbiont of Kiwa sp.                                                  |
| cc1a20baae9c705d4ce4ddc21cd48ecb | 4 | 0.847305238 | D_0__Bacteria;D_1__Firmicutes;D_2__Clostridia;D_3__Clostridiales;D_4__Ruminococcaceae;D_5__Butyrificoccus;Ambiguous_taxa                                                                                              |
| ea6d70a3073a2631241629b5be1a12ef | 4 | 0.99880395  | D_0__Bacteria;D_1__Firmicutes;D_2__Clostridia;D_3__Clostridiales;D_4__Peptostreptococcaceae;D_5__Paeniclostridium                                                                                                     |
| 1721390e92c8ec94f680613d2abfa4e5 | 3 | 0.999999968 | D_0__Bacteria;D_1__Planctomycetes;D_2__Phycisphaerae;D_3__Phycisphaerales;D_4__Phycisphaeraeaceae;D_5__JL-ETNP-F27;Ambiguous_taxa                                                                                     |
| 47a798da9c732214d382228868734180 | 3 | 0.999999734 | D_0__Bacteria;D_1__Dadabacteria;D_2__Dadabacteriia;D_3__Dadabacteriales;D_4__metagenome;D_5__metagenome;D_6__metagenome                                                                                               |

|                                  |   |             |                                                                                                                                                                                                                       |
|----------------------------------|---|-------------|-----------------------------------------------------------------------------------------------------------------------------------------------------------------------------------------------------------------------|
| 80c2824714f43afc7d5cf2bfd7fe87c1 | 3 | 0.90390555  | D_0__Bacteria;D_1__Bacteroidetes;D_2__Bacteroidia;D_3__Flavobacteriales;D_4__Crocinitomicaceae;D_5__Crocinitomix;Ambiguous_taxa                                                                                       |
| 8c68ef866ea38f62b8dfcff1c4046a17 | 3 | 0.982985514 | D_0__Bacteria;D_1__Proteobacteria;D_2__Deltaproteobacteria;D_3__SAR324 clade(Marine group B);D_4__uncultured bacterium;D_5__uncultured bacterium;D_6__uncultured bacterium                                            |
| 9791a91a6d944850f4b9a785ed666a8b | 3 | 0.830231704 | D_0__Bacteria;D_1__Marinimicrobia (SAR406 clade);D_2__uncultured marine bacterium;D_3__uncultured marine bacterium;D_4__uncultured marine bacterium;D_5__uncultured marine bacterium;D_6__uncultured marine bacterium |
| 98a71c6554e70951ba750ec1252c270e | 3 | 0.999851021 | D_0__Bacteria;D_1__Proteobacteria;D_2__Gammaproteobacteria;D_3__SAR86 clade;Ambiguous_taxa;Ambiguous_taxa;Ambiguous_taxa                                                                                              |
| 9e4bb52a30262dd18e9cc6ee7a51b08f | 3 | 0.943042595 | D_0__Bacteria;D_1__Proteobacteria;D_2__Alphaproteobacteria;D_3__Micavibrionales;D_4__Micavibrionaceae;D_5__uncultured;D_6__uncultured bacterium                                                                       |
| bfec995109ecdb78c9407f9673703274 | 3 | 0.999999999 | D_0__Bacteria;D_1__Proteobacteria;D_2__Gammaproteobacteria;D_3__SAR86 clade                                                                                                                                           |
| d0b7d52b3cf4151668dcf5eb892d0621 | 3 | 0.999929109 | D_0__Bacteria;D_1__Proteobacteria;D_2__Gammaproteobacteria;D_3__Oceanospirillales;D_4__Nitriocolaceae;D_5__Profundimonas;Ambiguous_taxa                                                                               |
| e6e0465de143c5fa2665b96e0fc6efa0 | 3 | 0.998613306 | D_0__Bacteria;D_1__Bacteroidetes;D_2__Bacteroidia;D_3__Cytophagales;D_4__Cyclobacteriaceae;D_5__Marinoscillum;Ambiguous_taxa                                                                                          |
| 143feb115e9ca370475882e79107400a | 2 | 0.999884546 | D_0__Bacteria;D_1__Proteobacteria;D_2__Gammaproteobacteria;D_3__Betaproteobacteriales                                                                                                                                 |
| 1494b3f147593c4487c77bf81ad1b72f | 2 | 0.999177113 | D_0__Bacteria;D_1__Verrucomicrobia;D_2__Verrucomicrobiae;D_3__Opitutales;D_4__Puniceicoccaceae;D_5__MB11C04 marine group;Ambiguous_taxa                                                                               |
| 16a17b6bff10137f8e1a022d6202656a | 2 | 0.955923338 | D_0__Bacteria;D_1__Bacteroidetes;D_2__Bacteroidia;D_3__Chitinophagales;D_4__Saprospiraceae;D_5__uncultured;D_6__uncultured bacterium                                                                                  |
| 64aa0a70eb77e52893e8f6b763ec3912 | 2 | 0.93062016  | D_0__Bacteria;D_1__Planctomycetes;D_2__OM190;Ambiguous_taxa;Ambiguous_taxa;Ambiguous_taxa;Ambiguous_taxa                                                                                                              |
| 67c9e284c7de43eb5596d0b6434a57f8 | 2 | 0.759345136 | D_0__Bacteria;D_1__Bacteroidetes;D_2__Bacteroidia;D_3__Bacteroidales;D_4__Prevotellaceae;D_5__Alloprevotella;D_6__gut metagenome                                                                                      |
| 7597f9affb71896463d206286537c96f | 2 | 0.962043014 | D_0__Bacteria;D_1__Firmicutes;D_2__Erysipelotrichia;D_3__Erysipelotrichales;D_4__Erysipelotrichaceae;D_5__Erysipelatoclostridium;Ambiguous_taxa                                                                       |
| 9a1187e6d6390c1c499f5fcdac7409dd | 2 | 0.955580637 | D_0__Bacteria;D_1__Chlamydiae;D_2__Chlamydiae;D_3__Chlamydiales                                                                                                                                                       |
| 9cae1a3205516123b356969fdf0ae6a3 | 2 | 0.767597456 | D_0__Bacteria;D_1__Firmicutes;D_2__Clostridia;D_3__Clostridiales;D_4__Ruminococcaceae;D_5__[Eu bacterium] coprostanoligenes group;D_6__uncultured bacterium                                                           |

|                                  |   |             |                                                                                                                                                                 |
|----------------------------------|---|-------------|-----------------------------------------------------------------------------------------------------------------------------------------------------------------|
| a017e5656bed86b3ce4efc4ae0afa01b | 2 | 0.999997973 | D_0__Bacteria;D_1__Epsilonbacteraeota;D_2__Campylobacteria;D_3__Campylobacteriales;D_4__Campylobacteraceae;D_5__Campylobacter                                   |
| d736a7f6a5f0457fe08269e4604c3852 | 2 | 0.993864882 | D_0__Bacteria;D_1__Tenericutes;D_2__Mollicutes;D_3__Mycoplasmatales;D_4__Mycoplasmataceae;D_5__Ureaplasma;D_6__gut metagenome                                   |
| ee78aacb586424536d6150fd3975c5d7 | 2 | 0.999997059 | D_0__Bacteria;D_1__Proteobacteria;D_2__Deltaproteobacteria;D_3__Desulfarculales;D_4__Desulfarculaceae;D_5__uncultured;Ambiguous_taxa                            |
| 267fcc354b6397d0441b08c2274f6287 | 1 | 0.917729639 | D_0__Bacteria;D_1__Proteobacteria;D_2__Gammaproteobacteria;D_3__Oceanospirillales                                                                               |
| 36ba763d09fcb5edf46f04298cc640c0 | 1 | 0.782141413 | D_0__Bacteria;D_1__Proteobacteria;D_2__Alphaproteobacteria;D_3__Kordiimonadales;D_4__uncultured                                                                 |
| 52ecbaefad84d6219c14f865457a431a | 1 | 0.938640681 | D_0__Bacteria;D_1__Proteobacteria;D_2__Gammaproteobacteria;D_3__UBA10353 marine group                                                                           |
| b834fc0909937d337ac9a5d1423a37e4 | 1 | 0.973737587 | D_0__Bacteria;D_1__Proteobacteria;D_2__Gammaproteobacteria;D_3__Oceanospirillales;D_4__Endozoicomonadaceae;D_5__Endozoicomonas;D_6__uncultured marine bacterium |
| dd9833fecbec2837598dc450e08febeb | 1 | 0.873543141 | D_0__Bacteria;D_1__Proteobacteria;D_2__Gammaproteobacteria;D_3__Betaproteobacteriales                                                                           |
| ebc0b6e340bcfca0ecd2c7868bbae828 | 1 | 0.912956972 | D_0__Bacteria;D_1__Verrucomicrobia;D_2__Verrucomicrobiae;D_3__Opitutales;D_4__Puniceococcales;D_5__Pelagicoccus;D_6__uncultured gamma proteobacterium           |



**Table S9.** Targeted region, forward and reverse names, sequences (5'→3') and reference of primers pairs used for molecular characterization.

| Targeted region | Forward Name | Sequence (5'→3')          | Reverse Name | Sequence (5'→3')          | Reference                                       |
|-----------------|--------------|---------------------------|--------------|---------------------------|-------------------------------------------------|
| 18S             | A            | AACCTGGTTGATC CTGCCAGT    | B            | TGATCCTTCTGCAGGTT CACCTAC | Medlin, 1988; Schmitt et al., 2005              |
| 18S             | 18S-AF       | CTGGTTGATCCTGCCAG         | 18S-BR       | CTGCAGGTTACCTAC           | Dohrmann et al., 2008; Collins, 2002            |
| 18S             | 18S1         | AACCTGGTTGATCCTGCCA       | 18S2         | TGCAGGTTACCTACAGAA        | Manuel et al., 2003                             |
| ITS             | RA2          | GTCCTGCCCTTTGT ACACA      | ITS2.2       | CCTGGTTAGTTTCTTTCTCC GC   | Wörheide et al., 2002a, b; Schmitt et al., 2005 |
| 28S             | NL4F         | GACCCGAAAGATGGTGA ACTA    | NL4R         | ACCTTGAGACCTGATGCG        | Dohrmann et al., 2008; Collins, 2002            |
| 28S             | C2           | GAAAAGAACTTGRARAGAGAGT    | D2           | TCCGTGTTCAAGACGGG         | Chombard et al., 1998                           |
| CO1             | dgLCO1490    | GGTCAACAAATCATAAAGAYATYGG | dgHCO2198    | TAAACTTCAGGGTGACCAARAAYCA | Meyer et al., 2005                              |
| CO1             | PorCOI2fwd   | AATATGNGGGCNCCNGGNATNAC   | PorCOI2rev   | ACTGCCCCATNGATAAAACAT     | Pons et al., 2017                               |

**Table S10.** Denoising process.

| Sample ID | Input | Filtered | Input passed filter (%) | Denoised | Merged | Input merged (%) | Non-chimeric | Input non-chimeric (%) |
|-----------|-------|----------|-------------------------|----------|--------|------------------|--------------|------------------------|
| B4        | 22476 | 22309    | 99.26                   | 20279    | 16985  | 75.57            | 11647        | 51.82                  |
| C6        | 14741 | 14711    | 99.8                    | 14148    | 12878  | 87.36            | 9108         | 61.79                  |
| D4        | 23248 | 23191    | 99.75                   | 22582    | 20948  | 90.11            | 13898        | 59.78                  |
| D6        | 18168 | 18095    | 99.6                    | 17240    | 16007  | 88.11            | 13212        | 72.72                  |
